# Supplementary material for: Hematopoietic SCT in Europe: data and trends in 2011
Source: PubMed Central journal article supplement — Bone Marrow Transplant. 2013 Apr 15;48(9):1161–7. doi: 10.1038/bmt.2013.51 (PMC3763517; doi:10.1038/bmt.2013.51), 2013-04-15
Supplement: bmt201351x1.pdf [file bmt201351x1.pdf]

## APPENDIX 2011

### List of transplant centres in 2011

(Total 1st HSCT (total all HSCT) N allogeneic 1st HSCT / N autologous 1st HSCT)

#### Algeria: (2 teams) (197 (204) 114/83)

Alger, Centre Pierre et Marie Curie, Serv. Hématologie Greffe de Moëlle, CIC 703, R. Hamladji (149 (156) 114/35)

Oran, University Hospital of Oran, Hematology, CIC 993, M. Bekadja, M. Brahimi, A. Arabi (48 (48) 0/48)

#### Austria: (12 teams) (374 (416) 165/209)

Graz, University of Graz, Klinische Abt. für Hämatologie, CIC 308, W. Linkesch, C. Kügerl (56 (58) 29/27)

Graz, Medical University Graz, Dept. Pediatrics, CIC 593, Ch. Urban (9 (12) 6/3)

Innsbruck, University Hospital, Clin. Immunobiology, CIC 271, G. Gastl, D. Nachbaur (62 (68) 32/30)

Klagenfurt, LKH Klagenfurt, 1. Medizinische Abteilung, , D. Geissler, M. Heistingner (7 (7) 0/7)

Linz, AO Krankenhaus, 3. Medizinische Abteilung, , M.A. Fridrik (9 (9) 0/9)

Linz, Allgem. öffentl. Krankenhaus der Elisabethinen, Internal Medicine, CIC 594, H. Kasparu (63 (69) 39/24)

Salzburg, LKA Salzburg, Div. Oncology, CIC 356, R. Greil, C. Russ (33 (35) 1/32)

Wien, St. Anna Kinderspital, , CIC 528, G. Mann, C. Peters, S. Matthes (26 (29) 16/10)

Wien, Donauspital Wien, SMZ-Ost, II. Med. Abt., CIC 767, C. Sebesta, P. Kier (3 (8) 0/3)

Wien, AKH Wien, Universitätsklinik für Innere Medizin I, CIC 227, H.T Greinix, P. Kalhs (69 (77) 42/27)

Wien, Wilhelminerspital der Stadt Wien, Med. Abt., Onkologie, CIC 828, H. Ludwig (23 (26) 0/23)

Wien, Hanusch-Krankenhaus, Ludwig-Boltzmann-Institut, CIC 743, E. Koller (14 (18) 0/14)

#### Belgium: (19 teams) (767 (829) 326/441)

Antwerpen, Stuivenberg ZH and A.Z. Middelheim, Hematology, CIC 339, P. Zachée, R. de Bock (43 (47) 24/19)

Brugge, A.Z. St. Jan, Hematology, CIC 506, D. Selleslag, T. Lodewyck, A. Van Hoof, J. Van Droogenbroeck, K. Van Eygen (57 (58) 26/31)

Brussels, Ac Z. VUC University Hospital, Dept. Med. Oncology, CIC 630, A. Schots (31 (32) 11/20)

Brussels, ULB, Hôpital Erasme, Dept. of Haematology, CIC 596, B. Nailly, A. Kentos, M. Lambermont (12 (12) 0/12)

Brussels, Cliniques Univers. St. Luc, Hématologie, CIC 234, X. Poiré, C. Vermylen (80 (84) 43/37)

Brussels, Institut Jules Bordet and the Children's University Hospital, Hematology, CIC 215, D. Bron, E. Sariban, C. Devalck, A. Ferster (54 (58) 28/26)

Charleroi, Grand Hôpital de Charleroi Notre-Dame, Hematologie, CIC 349, D. Pranger (10 (10) 0/10)

Charleroi, Hôpital Vésale de Charleroi, Hematology, CIC 804, A. Triffet (7 (7) 0/7)

Edegem, University Antwerpen, Dept. Hematology, CIC 996, W. Schroyens (30 (38) 14/16)

Gent, University Hospital Gent, Haematology and Bloodbank, CIC 744, L.A. Noens (79 (81) 39/40)

Haine-St. Paul, Hôpital de Jolimont, Serv. d'Hématologie, CIC 234, A. Delannoy, C. Ravoot, N.

Straetmans, V. Delrieu (17 (20) 0/17)

Hasselt, Jesse Ziekenhuis, Div. of Hematology, CIC 632, K. Theunissen, V. Madoe (45 (48) 0/45)

Leuven, U.Z. Gasthuisberg, Hematologie, CIC 209, G. Verhoef, M. Delforge, J. Maertens, D. Dierickx (133 (139) 86/47)

Liège, CHR de la Citadelle, Hématologie, CIC 353, S. Van Steenweghen, C. Andre, F. Scerbo (11 (16) 0/11)

Liège 1, University Hospital Sart-Tilman, Dept. of Hematology, CIC 726, Y. Béguin, B. De Prijck (73 (84) 35/38)

Mons, Hopital Ambroise Pare, Hematology, CIC 709, V. Robin (8 (8) 0/8)\*

Roeselare, Heilig Hartziekenhuis, Dept. of Onco-Haematology, CIC 646, F. Van Aelst, J. Tytgat, J. Demol (24 (26) 10/14)

Wilrijk, Sint Augustinos GVA, Dept of Hematology, CIC 715, J. Lemmens (12 (14) 0/12)

Yvoir, Clinique universitaire Mont-Godinne, Serv. d'Hématologie, CIC 234, C. Doyen (41 (47) 10/31)

#### Bosnia-Herzegovina: (2 teams) (11 (11) 0/11)

Sarajevo, Clinical Centre University Sarajevo, Clinic of Hematology, CIC 198, A. Sofo-Hafizovic (0 (0) 0/0)

Tuzla, University Clinical Centre Tuzla, Haematology, CIC 647, A. Kopic (11 (11) 0/11)

**Bulgaria:** (2 teams) (87 (88) 11/76)

Sofia, Pediatric Hospital for Oncohematology and Bone Marrow Transplantation, , CIC 346, D. Bobev, B. Avramova, M. Yordanova (14 (15) 3/11)

Sofia, National Centre of Hematology and Transfusiology, BMT Unit, CIC 859, G. Mihaylov (73 (73) 8/65)

**Croatia:** (3 teams) (170 (185) 41/129)

Zagreb, Clinical Hospital "Mercur", Dept. of Medicine, CIC 159, R. Vrhovac, B. Jaksic, H. Minigo (50 (51) 7/43)

Zagreb, University Hospital Rebro, Div. Hematology, CIC 302, B. Labar, D. Nemet, M. Mrcic (104 (115) 34/70)

Zagreb, University Hospital Dubrava, Department of Haematology, CIC 407, V. Pejisa, O. Jaksic (16 (19) 0/16)

**Cyprus:** (1 team) (17(17) 0/17)

Nicosia Strovolos, Nicosia General Hospital, Hematology Department, CIC 575, K. Melanthiou, C. Stylianou (17 (17) 0/17)

**Czech Republic:** (9 teams) (477 (550) 204/273)

Brno, Masaryk University Hospital, Dept. of Internal Medicine, CIC 597, J. Vorlicek, J. Mayer, Z. Koristek (105 (131) 37/68)

Hradec Kralové, Charles University, 2nd Dept. of Medicine, CIC 729, L. Jebavy, S. Filip, M. Blaha (56 (60) 29/27)

Olomouc, University Hospital, Dept. of Haemato-Oncology, CIC 574, E. Faber (57 (61) 19/38)

Pilsen, Charles University Hospital, Dept. of Haematology, CIC 718, P Jindra (65 (75) 35/30)

Prague, Thomayer Memorial Teaching Hospital, , CIC 375, J. Abrahamova, J. Nepomucká (0 (0) 0/0)

Prague, Charles University Hospital, Dept. of Clinical Hematology, CIC 318, T. Kozak (27 (33) 0/27)

Praha, University Hospital Motol, Dept. of Pediatrics Hem-Onco, CIC 452, P. Sedlacek (33 (45) 19/14)

Praha, Charles University Hospital, 1st Dept. of Medicine, CIC 745, M. Trneny (69 (78) 0/69)

Praha, Institute of Hematology and Blood Transfusion, and Blood Transfusion, CIC 656, A. Vitek, P. Kobyłka (65 (67) 65/0)

**Denmark:** (4 teams) (316 (357) 125/191)

Aalborg, Aalborg Hospital, Dept. of Hematology, CIC 848, J. Baech, I. Christiansen (21 (23) 0/21)

Aarhus, Amtssygehus and Skejby Hospital, Dept. of Hematology, CIC 634, E. Segel, B. Moeller (86 (91) 21/65)

Copenhagen, Rigshospitalet University Hospital, Haematology L 4042, CIC 206, H. Seneglov (176 (208) 104/72)

Herlev, Herlev Hospital, Dept. of Haematology, CIC 568, N. Clausen (33 (35) 0/33)

**Estonia:** (2 teams) (42 (47) 16/26)

Tallinn, Sa Pohja-Eesti Regionaalhaigla, K. Vaht, T. Jogi (18 (23) 0/18)

Tartu, Tartu University Children's Hospital, Dept. of Hematology, CIC 746, H. Everaus, A. Kaare (24 (24) 16/8)

**Finland:** (7 teams) (339 (367) 130/209)

Helsinki, Helsinki University Central Hospital, Dept. of Oncology, CIC 833, H. Joensuu, R. Janes (15 (15) 0/15)

Helsinki, University of Helsinki, Children's Hospital, CIC 219, U. Pihkala, S. Vettenranta (25 (32) 11/14)

Helsinki, Univeristy Central Hospital, Dept. of Medicine, CIC 515, L. Volin (115 (118) 75/40)

Kuopio, Kuopio University Hospital, Dept. Medicine, CIC 396, E. Jantunen, T. Nousiainen (42 (43) 0/42)

Oys, Oulu University Central Hospital, Dept. of Hematology, CIC 690, P. Koistinen, T. Turpeenniemi-Hujanen (30 (34) 0/30)

Tampere, Tampere University Hospital, Haematology Lab., CIC 635, R. Silvennoinen, M. Sinisalo, M.

Arola (42 (49) 0/42)

Turku, University Central Hospital, Dept. of Medicine, CIC 225, M. Itälä-Remes, K. Remes (70 (76) 44/26)

**France:** (78 teams) (4315 (4637) 1684/2631)

Amiens, University of Amiens: CHU Amiens, Maledies du Sang, CIC 955, G. Damaj, L. Breton (33 (37) 0/33)

Angers, CHRU, Service des, Maladies du Sang, CIC 650, N. Ifrah, S. François, P. Guardiola (78 (90) 43/35)

Angers, Centre Paul Papin, Service du Radiotherapie, R. Delva, E. Gamelin, A. Lortholary (new in 2012)

Argenteuil, Hopital Victordupouy, Hematology, CIC 199, L. Sutton (22 (22) 0/22)

Bayonne, C.H. de la Cote Basque, Service d'Hématologie, CIC 875, A. Banos (6 (8) 0/6)\*

Besançon, Hôpital Jean Minjot & Hôpital St. Jacques, Service d'Hématologie, CIC 233, P. Herve, E. Deconinck, P.Rohrlich (96 (101) 53/43)

Bordeaux, CHU Bordeaux Groupe Hospitalier Pellegrin-Enfants, Onco-Hématologie Pédiatrique, CIC 978, C. Jubert (34 (38) 23/11)

Boulogne sur Mer, CHU Hopital Duchenne, Hématologie, , B. Choufi, Dr. Voronina (13 (13) 0/13)

Brest, Centre Hosp. Universitaire Augustin Morvan, Onco-Hématologie-Hémostase, , S. Creachcadec (58 (63) 21/37)

Caen, Centre Régional François Baclesse, Serv. d'Hématologie, CIC 951, C. Fruchart (40 (44) 0/40)

Caen, Centre Hosp. Universitaire, Serv. d'Hématologie, CIC 251, O. Reman (62 (66) 29/33)

Clermont Ferrand, CRCTCP, CHU Estaing, Serv. d'Hématologie, CIC 273, J.-O. Bay, F. Démeocq, P. Travade (104 (113) 46/58)

Colmar, Hôpital Pasteur, Serv. d'Onco-Hématologie, B. Audhuy (7 (9) 0/7)

Corbeil Essonne, Hôpital Gilles de Corbeil, Serv. d'Hématologie, A. Devidas (17 (19) 0/17)

Creteil, Hopital Henri Mondor, Unite Hem Lymphoïdes, CIC 432, C. Haioun (27 (27) 0/27)

Créteil, CHU Henri Mondor, Serv. d'Hématologie Clinique, CIC 252, C. Cordonnier, M. Kuentz (36 (41) 35/1)

Dijon, Hôpital d'Enfants, D. Caillot (74 (86) 0/74)

Dunkerque, Centre Hospitalier, Hématologie, M. Wetterwald (10 (10) 0/10)

Grenoble, Centre Hospitalier A. Michallon, Serv. Hematologie, CIC 270, J. Y. Cahn, F. Garban, P. Drillat, C. Bulabois (92 (96) 50/42)

Le Chesnay, C.H. de Versailles, CIC 877, S. Castaigne (25 (29) 0/25)\*

Lens, Serv. d'Hématologie Clinique, L. Stalnikiewicz (new in 2012)

Lille, Centre Hospitalier Saint Vincent, Hématologie Clinique, N. Cambier (22 (22) 0/22)

Lille, Centre Oscar Lambret, Oncologie Médicale A, A. Defachelles (17 (17) 0/17)

Lille, Hôpital Claude Huriez, Serv. d'Hématologie, CIC 277, F. Bauters, J.P. Jouet (123 (138) 95/28)

Lille, Hôpital Jeanne de Flandre, Unité Protégée A, CIC 963, B. Bruno (16 (16) 16/0)

Limoges, CHU Dupuytren, Serv. d'Hématologie Clinique, CIC 977, D. Bordessoule, P. Turlure (51 (51) 21/30)

Lyon, Hôpital Edouard Herriot, Service d'Hématologie Médicale, CIC 671, M. Michallet, E. Wattel, A. Thiebaut, F. Nicolini, J. Troncy, X. Thomas (83 (91) 81/2)

Lyon, Centre Léon Bérard, , CIC 241, P. Biron, T. Philip (78 (80) 0/78)

Lyon, Institut d'Hematologie et d'Oncologie Pédiatrique(IHOP), Unité de Coordination, CIC 806, Y. Bertrand, V. Mialou (47 (47) 32/15)

Marseille, Inst. Paoli-Calmettes, Transpl. Médullaire, CIC 230, D. Blaise (304 (330) 120/184)

Marseille, Hôpital d'Enfants de la Timone, Serv. Hématologie Pédiatrique, CIC 192, G. Michel, F. Bourgue (27 (27) 27/0)

Marseilles, Hôpital d'Enfants de la Timone, Serv. Hématologie Pédiatrique, CIC 301, C. Coze, J.L. Bernard J. Frayfer (13 (13) 0/13)

Meaux, Centre Hospitalier de Meaux, Serv. d'Hématologie, CIC 194, J. Frayer (8 (12) 0/8)

Metz, Hôpital Notre Dame de Bon-Secours, Méd. A, Hématologie Clinique, V. Dorvaux, B. Christen (30 (31) 0/30)

Montpellier, CHR Lapeyronie, Hematology Department, CIC 926, JF. Rossi, N. Fegueux (151 (154) 71/80)

Mulhouse, Hôpital E. Muller, Département d'Hématologie, B. Drénou, M. Ojeda (12 (12) 0/12)

Nantes, Centre Hosp. Univ. de Nantes, Hôtel-Dieu, CIC 253, M. Mohty, J.L. Harousseau (229 (252) 101/128)

Nice, Hôpital de l'Archet (incl. Hopital Lenval, Hématologie Clinique, CIC 523, N. Gratecos, J.P. Cassuto, D. de Ricaud (62 (63) 32/30)

Nice, Centre Antoine Lacassagne, A. Thyss (45 (46) 0/45)

Paris, Hôpital Saint-Louis, Serv. d'Immuno-Hématologie, CIC 969, J- P. Fernand, B. Arnulf (no report)

Paris, Hôpital Saint-Louis, Serv. des Maladies du Sang, CIC 960, H. Dombret, L. Degos, P. Rousselot (4 (4) 0/4)

Paris, Hôpital Cochin, M. Quarre (43 (52) 0/43)

Paris, Hôpital Necker des enfants malades, Unité d'Immunologie, CIC 201, A. Fischer (37 (45) 32/5)

Paris, Hôpital Saint Louis, Hématologie Adulte, CIC 805, C. Thieblemont, G. Gisselbrecht (56 (56) 0/56)

Paris, Hôpital Saint-Louis, Bone Marrow Transplant Unit, CIC 207, G. Socié, E. Gluckman, H. Esperou (130 (134) 127/3)

Paris, Hôpital St. Antoine, Maladies du Sang, CIC 775, C. Gorin, L. Fouillard, B. Rio, J.P. Marie, O. Legrand (78 (87) 36/42)

Paris, Groupe Hosp. Pitié-Salpêtrière, , CIC 262, J - P. Vernant, V. Leblond, N. Dedhin (109 (115) 58/51)

Paris, Hôpital Tenon, Oncologie médicale, CIC 747, J.P. Lotz (22 (26) 0/22)

Paris, Hôp. d'enfants Armand-Trousseau, Hématologie & Oncologie Pédiatrique, CIC 675, G. Leverger, A. Auvrignon, L. Douay (5 (5) 0/5)

Paris, Hôpital Robert Debré, Hémato-immunologie, CIC 631, A. Baruchel, J.H. Dalle, G. Cotten (56 (59) 54/2)

Paris, Hôpital Necker, Serv. d'Hématologie/Adulte, CIC 160, O. Hermine, A. Buzyn, F. Suarez (62 (67) 22/40)

Paris, Institut Curie, Serv. d'Hématologie, CIC 702, J. Michon (53 (53) 0/53)

Paris - Clamart, Hôpital d'Instruction des Armées Percy, CIC 665, T. de Revel, G. Nedellec (59 (61) 28/31)

Pessac, Hôpital Haut-Lévêque, CHU Bordeaux, CIC 267, N. Milpied, G. Marit, R. Tabrizi (159 (171) 87/72)

Pierre Benite, Centre Hospitalier Lyon-Sud, Serv. d'Hématologie, CIC 901, G. Salles (95 (102) 0/95)

Poitiers, Cité Hosp. La Milétrie, BMT Unit, CIC 264, M. Maillard, C. Giraud (72 (78) 26/46)

Pontoise, Centre Hosp. René Dubos, Unité d'hématologie et de thérapie Cellulaire, CIC 961, L. Fouillard (18 (18) 0/18)

Reims, Hôpital Robert Debré, Int. Medicine & Hematology Dept., CIC 959, A. Delmer, B. Pignon, C. Hemberlin (47 (47) 0/47)

Rennes, Chru de Rennes, Hôp. Sud, Clin. Méd. Infantile, CIC 661, V. Gandemer (125 (126) 40/85)

Rennes, Hôpital de Pontchaillou, Hématologie Clin. Adulte, CIC 661, T. Lamy (24 (26) 13/11)

Roubaix, Hôpital V. Provo, Hématologie Clinique, I. Plantier-Colcher (17 (18) 0/17)

Rouen, Centre Henri Becquerel, Serv. d'Hématologie, CIC 941, H. Tilly, P. Lenain (98 (98) 28/70)

Rouen, CHU de Rouen, Hôp. Charles Nicolle, Pédiatrie & Génétique Médicale, J.P. Vannier (18 (19) 9/9)

Saint Cloud, Centre René Huguenin, Institut Curie, M. Janvier (24 (25) 0/24)

Saint Priest en Jarez, Institute de Cancérologie Lucien Neuwirth, Bureau d'Études Cliniques, V. Vindrieux (50 (58) 17/33)

Saint Quentin, Centre Hospitalier de Saint Quentin, CIC 406, R. Garidi (11 (14) 0/11)

St. Etienne, CHRU St. Etienne, Ser. Hématologie Clinique, D. Guyotat, P. Oriol (50 (58) 17/33)

Strasbourg, CHU Hautepierre, Onco-hématologie, B. Lioure (79 (94) 25/54)

Strasbourg, Hopital Hautpierre, Pédiatrie Hématol. III, P. Lutz (15 (15) 10/5)

Toulouse, Hôpital de Purpan, Service d'Hématologie, CIC 624, M. Attal, J-C. Nogaro (118 (122) 46/72)

Toulouse, Hôpital de Purpan, Serv. d'Hématologie Peds, CIC 952, H. Rubie (12 (18) 0/12)

Tours, Hôpital Bretonneau, CIC 272, P. Colombat (107 (115) 17/90)

Valenciennes, Centre Hosp. de Valenciennes, Serv. d'Hématologie Clinique, M. Simon (no report)

Vandœuvre, Hôpital d'Enfants, Pédiatrie 2, P. Bordigoni (59 (60) 52/7)

Vandœuvre, CHU Nancy-Brabois, Hématologie et Médecine Interne, P. Lederlin, F. Witz (76 (76) 0/76)

Villejuif, Institut Gustave Roussy, Hematology Division, BMT Unit, CIC 666, J-H. Bourhis, C. Boccaccio, J-M. Vantelon (110 (134) 44/66)

Villejuif, Institut Gustav Roussy, Pediatric BMT Unit, CIC 503, D. Valteau-Couanet (61 (62) 0/61)

Villejuif, Hôpital Paul Brousse, Serv. d'Hématologie, , B. Delmas-Marsalet (4 (5) 0/4)

**Germany:** (107 teams) (5778 (6783) 2848/2930)

Aachen, Universitätsklinikum RWTH, Med. Klinik IV, CIC 348, O. Galm, T. Brümmendorf, E. Jost (29 (38) 0/29)

Augsburg, Klinikum Augsburg, II. Med. Klinik, Hämatologie, CIC 152, Chr. Schmidt, G. Schlimok (36 (42) 19/17)

Bayreuth, Klinikum Bayreuth GmbH, Medizinische Klinik IV, Hämatologie u. Internistische Onkologie, CIC 136, Ch. Stoll, A. Kiani (10 (11) 0/10)

Berg, Schön Klinik Starnberger See, Ch. Straka (24 (40) 0/24)

Berlin, Universitäts-Klinik der FU Benjamin Franklin, Campus Benjamin Franklin, Med. Klinik III - Hämatologie/Onkologie/Transfusionsmed., CIC 590, L. Uharek, E. Thiel (92 (117) 51/41)

Berlin, HELIOS Klinikum Berlin-Buch, Robert-Rössle Klinik, Hämatologie/Onkologie/Tumorimmunologie, CIC 518, W.-D. Ludwig, M. Hildebrandt (35 (46) 0/35)

Berlin, Charité - Universitätsmedizin Berlin, Campus Virchow Klinikum, Klinik für Pädiatrie m. S. Onkologie und Hämatologie, CIC 336, G. Gaedicke, W. Ebell (27 (33) 22/5)

Berlin, Vivantes Netzwerk für Gesundheit - Klinikum Neukölln, Innere Med. II, Hämatologie/Onkologie, CIC 105, M. de Wit, L. Marretta (10 (14) 0/10)

Berlin, Charité - Universitätsmedizin Berlin, Campus Virchow Klinikum, Med. Klinik m. S. Hämatologie und Onkologie, CIC 807, B. Dörken, R. Arnold (131 (151) 85/46)

Bochum, Ruhr Universität Bochum, Med. Universitätsklinik / Knappschafts Krankenhaus, Hämatologie/Onkologie, CIC 124, W. Schmiegel, C. Teschendorf, R. Schroers (43 (47) 0/43)

Bonn, Universitätsklinikum Bonn, Zentrum f. Kinderheilkunde, Päd. Hämatologie/Onkologie, CIC 403, A. Simon, D. Dilloo (4 (4) 0/4)

Bonn, Universitätsklinikum Bonn, Med. Klinik u. Poliklinik III, Hämatologie und Onkologie, CIC 134, P. Brossart, I. Schmidt-Wolf, M. von Lilienfeld-Toal (17 (17) 0/17)

Braunschweig, Städtisches Klinikum, Med. Klinik III, CIC 674, G. Fritsch, F. Lordick (55 (67) 0/55)

Bremen, Klinikum Bremen-Mitte gGmbH, Klinik f. Innere Medizin I, CIC 602, B. Hertenstein, H. Thomssen (41 (48) 15/26)

Bremen, Ev. Diakonie-Krankenhaus GmbH, Med. Klinik, Hämatologie/Onkologie, CIC 111, K.H. Pflüger, J. Kullmer (18 (25) 0/18)

Chemnitz, Klinikum Chemnitz GmbH, Klinik für Innere Medizin III, CIC 104, M. Hänel, A. Morgner (75 (84) 6/69)

Cottbus, Carl-Thiem-Klinikum, II. Med. Klinik, Hämatologie, CIC 102, H. Steinhauer, N. Peter (16 (26) 0/16)

Dresden, Universitätsklinikum Carl Gustav Carus a. d. TU Dresden, Med. Klinik u. Poliklinik I, CIC 808, G. Ehninger, M. Bornhäuser (182 (201) 132/50)

Duisburg, Katholisches Klinikum Duisburg, St. Johannes Hospital, Onkologie/Hämatologie, CIC 519, C. Aul, R. Hartwig (40 (55) 0/40)

Düsseldorf, Universitätsklinikum Düsseldorf, Klinik f. Kinder-Onkologie, -Hämatologie u. Immunologie, CIC 651, A. Borkhardt, R. Meisel, F. Schuster (35 (42) 28/7)

Düsseldorf, Universitätsklinikum Düsseldorf, Klinik f. Hämatologie, Onkologie u. klin. Immunologie, CIC 390, R. Haas, G. Kobbe, R. Fuchs, F. Schlegel (119 (163) 47/72)

Erlangen, Universitätsklinikum Erlangen, Kinder- u. Jugendklinik, CIC 809, W. Holter, W. Rascher, D. Stachel (11 (12) 9/2)

Erlangen, Universitätsklinikum Erlangen, Med. Klinik 5, Hämatologie u. Internistische Onkologie, CIC 809, W. Rösler, A. Mackensen (62 (69) 29/33)

Essen, West German Cancer Center, West German Cancer Center, CIC 127, M. Schuler, S. Bauer (17 (19) 0/17)

Essen, Universitätsklinikum, Zentrum f. Kinderheilkunde, Päd. Hämatologie/Onkologie/Endokrinologie, CIC 126, C. U. Dührsen, R. Noppeney (48 (62) 0/48)

Essen, Evangelisches Krankenhaus Essen-Werden GmbH, Zentrum f. Innere Medizin, Hämatologie/Onkologie/Stammzelltransplantation, CIC 784, W. Heit, M. Wattad (65 (70) 14/51)

Essen, Universitätsklinikum, Innere Klinik u. Poliklinik, Kinder- u. Jugendklinik, CIC 259, B. Kremens (16 (19) 12/4)

Essen, Universitätsklinikum, Med. Klinik u. Poliklinik, Zentrum f. Innere Med./Hämatologie, CIC 259, D.W. Beelen (180 (183) 177/3)

Flensburg, Malteser Krankenhaus, St. Franziskus-Hospital, Med. Klinik I, CIC 970, N. Basara, H. Menzel (starting in 2012) (0 (0) 0/0)

Frankfurt (Main), Onkologische Gemeinschaftspraxis, KH Bethanien, CIC 193, W. Knauf (20 (25) 0/20)

Frankfurt (Main), Klinikum d. Joh.-W.-Goethe Universität, Klinik f. Kinderheilkunde III, Hämatologie/Onkologie, CIC 138, T. Klingebiel, P. Bader (37 (51) 31/6)

Frankfurt (Main), KH Nordwest, Klinik f. Onkologie u. Hämatologie, , E. Jäger, E. Weidmann (0 (0) 0/0)

Frankfurt (Main), Klinikum d. Joh.-W.-Goethe Universität, Med. Klinik II, KMT-Einheit, CIC 297, H. Serve, H. Martin (96 (106) 56/40)

Frankfurt (Oder), Klinikum Frankfurt (Oder) GmbH, Abt. f. Innere Medizin, CIC 190, M. Kiehl (21 (31) 9/12)

Freiburg, Universitätsklinikum Freiburg, Zentrum f. Kinderheilkunde u. Jugendmedizin, Klinik IV: Päd. Hämatologie/Onkologie, CIC 810, C. Niemeyer, B. Strahm (20 (24) 17/3)

Freiburg, Universitätsklinikum Freiburg, Med. Universitätsklinik, Hämatologie/Onkologie, CIC 810, R. Mertelsmann, J. Finke (174 (198) 79/95)

Gießen, Universitätsklinikum Gießen, Zentrum für Kinderheilkunde u. Jugendmedizin, Hämatologie/Onkologie, CIC 326, A. Reiter, W. Wössmann (10 (13) 7/3)

Göttingen, Georg-August Universität, Innere Medizin, Hämatologie/Onkologie, CIC 552, L. Trümper, G. Wulf (104 (114) 61/43)

Greifswald, Universitätsklinikum Greifswald AöR, Klinik u. Poliklinik f. Innere Medizin , CHämatologie/Onkologie/Transplantationszentrum, CIC 530, W. Krüger (27 (31) 20/7)

Greifswald, Universitätsklinikum Greifswald AöR, Klinik u. Poliklinik für Kinder- u. Jugendmedizin, Päd. Onkologie u. Hämatologie, CIC 530, H. Graf von Einsiedel (5 (5) 2/3)

Hagen, Kath. KH Hagen gGmbH, St. Marien-Hospital, Klinik f. Hämatologie/Onkologie, CIC 536, V. Rethwisch, D. Auffermann,, H-W. Lindemann (20 (23) 0/20)

Halle (Saale), Universitätsklinikum Halle (Saale), Universitätsklinik u. Poliklinik, Kinder- u. Jugendmedizin, CIC 654, D. Körholz, C. Manz- Körholz (5 (7) 5/0)

Halle (Saale), Universitätsklinikum Halle (Saale), Klinik f. Innere Medizin IV, Onkologie/Hämatologie, CIC 338, L-Müller, G. Behre, H-J. Schmoll (33 (52) 17/16)

Hamburg, Asklepios Klinik Altona, II. Med. Abteilung, CIC 366, D. Braumann, H. Salwender (58 (85) 0/58)

Hamburg, Universitätsklinikum Hamburg-Eppendorf, Onkologisches Zentrum II, Med. Klinik u. Poliklinik Onkolog. Hämatolog. KMT, Pneumolog., CIC 673, C. Bokemeyer (49 (66) 0/49)

Hamburg, Asklepios Klinik St. Georg, Hämatologie, CIC 153, N. Schmitz, M. Zeis, B. Glass (158 (161) 88/70)

Hamburg, Universitätsklinikum Hamburg-Eppendorf, Interdisziplinäre Klinik u. Poliklinik f. Stammzelltransplantation, CIC 614, N. Kröger (176 (197) 164/12)

Hameln, Sana Klinikum Hameln-Pyrmont, Innere Medizin, Hämatologie/Onkologie, CIC 112, H. Schmidt, K. Buhrmann, F. Krebbel (19 (23) 9/10)

Hamm, Evangelisches Krankenhaus, Med. Klinik, Hämatologie/Onkologie/Autol. KMT, CIC 509, J. Schubert, E. Lange (14 (15) 0/14)

Hamm, St. Marienhospital Hamm, Transplantationseinheit, Station C, CIC 147, H. Dürk, D. Metzner, M. Hemeier (12 (13) 0/12)

Hannover, Klinikum Region Hannover GmbH, Med. Klinik III, Hämatologie/Onkologie, CIC 342, H. Kirchner, M. Sosada (16 (26) 0/16)

Hannover, Medizinische Hochschule Hannover, Klinik f. Hämatologie, Hämostaseologie, Onkologie u. Stammzelltransplantation, CIC 295, A. Ganser, J. Krauter (107 (117) 80/27)

Hannover, Medizinische Hochschule Hannover, Päd. Hämatologie/Onkologie, Kinderheilkunde IV, CIC 295, K. Welte, K. Sykora (41 (43) 37/4)

Heidelberg, Universitätsklinikum Heidelberg, Medizinische Klinik, Innere Medizin V, CIC 524, P. Dreger, A.D. Ho (274 (341) 110/164)

Heidelberg, Angelika-Lautenschläger-Klinik, Zentrum für Kinder- u. Jugendmedizin, Klinik Kinderheilkunde III, CIC 524, J. Greil, A. Kulozik (10 (12) 6/4)

Homburg (Saar), Universitätsklinikum des Saarlandes, Med. Klinik u. Poliklinik, Innere Med. I, CIC 785, M. Pfreundschuh, G. Held (2 (2) 0/2)

Homburg (Saar), Universitätsklinikum des Saarlandes, Kinder- und Jugendmedizin, Klinik für Pädiatrische Onkologie und Hämatologie, CIC 785, C. Hoffmann (82 (98) 45/37)

Jena, Universitätsklinikum Jena, Klinik f. Innere Medizin, Mildred-Scheel-Station f. KMT (Station 520), CIC 533, A. Hochhaus, H.G. Sayer (78 (87) 32/46)

Jena, Universitätsklinikum Jena, Klinik f. Kinder- u. Jugendmedizin, CIC 750, J. Beck, B. Gruhn (17 (21) 12/5)

Kaiserslautern, Westpfalz-Klinikum GmbH, Med. Klinik I, CIC 357, H. Link, St. Mahlmann (6 (8) 0/6)

Karlsruhe, Städt. Klinikum Karlsruhe gGmbH, Med. Klinik III, Hämatologie/Onkologie/Infektionskrankheiten, CIC 290, M. Bentz, S. Wilhelm (45 (56) 16/29)

Kassel, Klinikum Kassel GmbH, Med. Klinik IV, Hämatologie/Onkologie/Immunologie, CIC 118, M. Wolf, E. U. Steinhauer (15 (23) 0/15)

Kiel, Universitätsklinikum Schleswig-Holstein / Campus Kiel, II. Med. Klinik, Sektion f. Stammzell- u. Immuntherapie, CIC 256, M. Gramatzki, T. Valerius (103 (127) 53/50)

Kiel, Universitätsklinikum Schleswig-Holstein / Campus Kiel, Klinik für Allgemeine Pädiatrie, CIC 256, M.

Schrappe (10 (12) 6/4)  
Koblenz, Stiftungsklinikum Mittelrhein, Zentrum für Innere Medizin, Abt. Hämatologie, Onkologie, Gastroenterologie u. Palliativmedizin, CIC 897, D. Niemann (new in 2012)  
Köln, Universitätsklinikum Köln, Klinik I f. Innere Medizin, Hämatologie/Onkologie, CIC 534, M. Hallek, Chr. Scheid, F. Berthold, T. Simon (206 (212) 83/123)  
Leipzig, Universitätsklinikum Leipzig, Zentrum für Innere Medizin, Abt. Hämatologie/Onkologie, CIC 389, D. Niederwieser (186 (213) 127/59)  
Lemgo, Klinikum Lippe-Lemgo, II. Med. Klinik, Hämatologie/Onkologie, CIC 114, F. Hartmann, C. Constantin (15 (22) 0/15)  
Lübeck, Universitätsklinikum Schleswig-Holstein / Campus Lübeck, Klinik f. Kinder- u. Jugendmedizin, Hämatologie/Onkologie/Immunologie, CIC 367, M. Lauten (0 (0) 0/0)  
Lübeck, Universitätsklinikum Schleswig-Holstein / Campus Lübeck, Hämatologie/Onkologie, CIC 367, H. Biersack (24 (24) 14/10)  
Lübeck, Sana Kliniken Lübeck GmbH, Klinik f. Hämatologie u. Onkologie, Hämatologie/Onkologie, CIC 137, S. Fetscher, J. Schmielau (24 (24) 0/24)  
Ludwigshafen, Klinikum der Stadt Ludwigshafen a. Rhein gGmbH, Medizinische Klinik A, CIC 140, M. Uppenkamp, M. Hoffmann (13 (15) 0/13)  
Magdeburg, Universitätsklinikum Magdeburg A. ö. R., Zentrum für Innere Medizin, Klinik f. Hämatologie/Onkologie, CIC 359, T. Heinicker, T. Fischer (30 (33) 7/23)  
Mainz, Uniklinik Mainz, III. Med. Klinik u. Poliklinik, KMT/Hämatologie, CIC 786, W. Herr, T. Wölfel (126 (129) 70/56)  
Mannheim, Universitätsmedizin Mannheim, III. Med. Klinik, CIC 142, A. Hochhaus, J. Hastka, W. Hofmann (36 (42) 22/14)  
Marburg, Uniklinikum Marburg, ZIM, SP Hämatologie, CIC 645, A. Neubauer, A. Burchert (70 (85) 42/28)  
Minden, Klinikum Minden, Hämatologie/Onkologie, CIC 113, M. Griesshammer, H.J. Tischler (18 (25) 0/18)  
Mönchengladbach, Kliniken Maria Hilf GmbH, Krankenhaus St. Franziskus, CIC 120, U. Graeven (25 (32) 0/25)  
München, Klinik f. Hämatologie, Onkologie, Immunologie, Infektiologie u. Tropenmedizin, Klinikum Schwabing, Städtisches Klinikum München GmbH, CIC 151, Ch. Nerl, N. Fischer (18 (24) 0/18)  
München, Klinikum Innenstadt d. LMU, Kinderklinik u. Poliklinik im Dr. von Haunerschen, CIC 149, I. Schmidt, M. Albert (32 (34) 27/5)  
München, Städt. Klinikum München GmbH, Klinikum Harlaching, Klinik f. Hämatologie, Onkologie u. Palliativmedizin, CIC 664, M. Hentrich, M. Karthaus (18 (28) 0/18)  
München, Klinikum der Universität München-Großhadern, Med. Klinik III, Häm. Transplantation, CIC 513, H. -J. Kolb, W. Hiddemann (131 (148) 87/44)  
München, Klinikum rechts der Isar der TU München, III. Med. Klinik und Poliklinik, CIC 558, C. Peschel, H. Menzel (71 (86) 31/40)  
München, Kinderklinik d. TU München, Krkh. München-Schwabing, CIC 189, S. Burdach, A. Wawer (7 (9) 3/4)  
München, Klinikum Innenstadt, Med. Klinik d. L.-M.-Universität München, CIC 148, M. Reincke, F. Oduncu (25 (37) 0/25)  
Münster, Westfälische Wilhelms- Universität, Innere Medizin A - KMT-Zentrum, CIC 680, W. Berdel, J. Kienast (196 (216) 119/77)  
Münster, Universitätsklinikum Münster, Klinik f. Kinder- u. Jugendmedizin, Päd. Hämatologie u. Onkologie - KMT, CIC 505, K. Ehlert, H. Jürgens (30 (35) 22/8)  
Nürnberg, Klinikum Nürnberg Nord, Med. Klinik 5, Einheit f. KMT, Med. Onkologie/Hämatologie, CIC 625, M. Wilhelm, H. Wandt (69 (78) 43/26)  
Oldenburg, Klinikum Oldenburg gGmbH, Zentrum f. Innere Medizin, Hämatologie/Onkologie, CIC 749, B. Metzner, C. H. Köhne (64 (101) 24/40)  
Osnabrück, Klinikum Osnabrück, Klinik f. Onkologie/Hämatologie, CIC 101, R. Peceny, H.J. Hartlapp (9 (17) 0/9)  
Potsdam, Klinikum Ernst-von-Bergmann, Med. Klinik, Hämatologie/Onkologie, CIC 106, G. Maschmeyer, A. Dukat (25 (31) 0/25)  
Regensburg, Universität Regensburg, Hämatologie u. Internistische Onkologie, CIC 787, R. Andreesen, E. Holler, A. Reichle (115 (150) 69/46)  
Rostock, Universitätsklinikum Rostock, Klinik u. Poliklinik f. Innere Medizin/Hämatologie/Onkologie, CIC

585, M. Freund, M. Schmitt (51 (68) 22/29)  
 Rotenburg (Wümme), I. Medizinische Klinik, Diakoniekrankenhaus, sHämatologie/Onkologie, CIC 871, J. Potratz, F. Heits (18 (26) 0/18)  
 Siegen, St. Marien-Krankenhaus Siegen, Med. Klinik III, Klinik f. Hämatologie u. Internistische Onkologie, CIC 135, W. Gassmann, K. Franke (7 (7) 0/7)  
 Stuttgart, Robert-Bosch-Krankenhaus, Hämatologie/Onkologie, CIC 145, W. Aulitzky, S. Martin, M. Kaufmann (54 (60) 27/27)  
 Stuttgart, Olgahospital Stuttgart, Klinik f. Kinder u. JugendmedizinHämatologie/Onkologie, CIC 701, St. Bielack, E. Koscielniak (6 (7) 0/6)  
 Stuttgart, Kooperatives Stammzellzentrum Stuttgart, Diakonieklinikum Stuttgart und Klinikum Stuttgart, Standort Katharinenhospital, CIC 143, H. G. Mergenthaler, J. Schleicher, E. Heidemann (33 (43) 0/33)  
 Tübingen, Universitätsklinik Tübingen, Med. Klinik II, CIC 223, L. Kanz, C. Faul (143 (156) 71/72)  
 Tübingen, Universitätsklinik Tübingen, Klinik f. Kinderheilkunde u. Jugendmedizin, Hämatologie/Onkologie, CIC 535, R. Handgretinger, P. Lang (50 (54) 47/3)  
 Ulm, Universitätsklinikum Ulm, Klinik u. Poliklinik f. Kinder- u. JugendmedizinImmunologie u. Knochenmarktransplantation, CIC 204, K. M. Debatin, A. Schultz (130 (156) 66/64)  
 Ulm, Universitätsklinikum Ulm, Med. Klinik u. Poliklinik, Innere Med. III, CIC 204, H. Döhner, D. Bunjes (30 (37) 28/2)  
 Villingen-Schwenningen, Schwarzwald-Baar Klinikum, Abt. Innere Med. II, Onkologie/Hämatologie/Immunologie/Infektiologie, CIC 155, W. Brugger, F. Köhler (19 (19) 0/19)  
 Westerstede, Ammerland-Klinik GmbH, Lehrkrankenhaus der Uni Göttingen, Klinik f. Innere Medizin, CIC 429, D. Kohl, W. Holtkamp (7 (10) 0/7)  
 Wiesbaden, Dr.-Horst-Schmidt-Kliniken GmbH, Innere Med. III, Hämatologie/Onkologie, CIC 586, N. Frickhofen, B. Jung (8 (13) 0/8)  
 Wiesbaden, Deutsche Klinik f. Diagnostik, Zentrum f. Blutstammzell- u. Knochenmarktransplantation, CIC 311, R. Schwerdtfeger, M. Schleuning, H. Baurmann (88 (94) 73/15)  
 Würzburg, Universitätsklinikum Würzburg, Kinderklinik u. PoliklinikPäd. Onkologie/Hämatologie/Stammzelltransplantation, CIC 196, P. G. Schlegel (22 (25) 13/9)  
 Würzburg, Universitätsklinikum Würzburg, Med. Klinik und Poliklinik II (ZIM), Zentrum f. Stammzelltherapie, CIC 712, H. Einsele, G. Stuhler (227 (240) 103/124)

**Greece:** (14 teams) (332 (355) 135/197)

Alexandroupolis, Thrace University Medical School, Dept. of Haematology, BMT Unit, CIC 681, G. Bourikas, D. Pantelidou (1 (1) 0/1)  
 Athens, Attikon University General Hospital, BMT Unit, CIC 604, I. Dervenoulas (30 (30) 11/19)  
 Athens, St. Savas Hospital, Hellenic Cancer Institute, CIC 751, A. Efremidis, G. Koumakis, M. Stamatellou, K. Papanastassiou, I. Fillis (23 (30) 2/21)  
 Athens, 'Aghia Sophia' Children's Hospital, BMT Unit, CIC 752, S. Graphakos, G. Vessalas (44 (48) 36/8)  
 Athens, Evangelismos Hospital, Dept. Haematology, BMT Unit, CIC 622, D. Karakassis, N. Harhalakis (52 (57) 38/14)  
 Athens, Athens Medical Center, Dept. of Hematology, CIC 603, A. Pigadito (no report)  
 Athens, Alexandra Hospital, Dept. Of Clinical Therapeutics, CIC 431, C. Papadimitriou (21 (21) 0/21)\*  
 Athens, Laikon General Hospital, Hematology, CIC 438, J. Meletis, M. Angelopoulou (27 (28) 0/27)  
 Athens, Athens General Hospital G. Gennimatas, Haematology Dept, BMT Unit, CIC 638, A. Galanopoulos (no report)  
 Esokhi, Thessaloniki, The George Papanicolaou Gen. Hosp., Dept. Haematology, CIC 561, A. Anagnostopoulos (102 (104) 40/62)  
 Heraklion, University Hospital of Heraklion, Hematology, CIC 435, H. Papadak (8 (8) 0/8)  
 Heraklion, University Hospital Heraklion, Pediatric Hematology-Oncology, CIC 352, E. Stiakaki (3 (3) 0/3)  
 Maroussi-Athens, Diagnosis & Therapy Centre "Hygeia", Dept. Hematology, BMT Unit, CIC 643, G. Karianakis (6 (6) 0/6)  
 Patras, Patras Univ. Medical School, Hematology Division, CIC 281, N. C. Zoumbos, A. Spyridonidis, A. Symeonidis, M. Tiniakou (15 (19) 8/7)

**Hungary:** (5 teams) (305 (310) 91/214)

Budapest, St. Istvan & St. Laszlo Hospital of Budapest, BMT Unit adults, CIC 556, T. Masszi, P. Reményi (158 (160) 62/96)



Budapest, Szent Laszlo Hospital, Ped BMT Unit, CIC 824, G. Kriván, E. Torbvágyi, L. Lengyel (38 (40) 19/19)  
Debrecen, University of Debrecen, 2nd Dept. Medicine, Transplantation Unit, CIC 648, A. Kiss (49 (49) 0/49)  
Miskolc, Postgraduate Medical School, Dept. of Pediatrics/BMT Unit, CIC 599, N. Kalman, G. Marton, A. Kelemen (15 (16) 10/5)  
Pécs, University of Pécs, 1st Dept. of Internal Medicine, CIC 682, H. Losonczy, M. Dávid, Á. Szomor (45 (45) 0/45)

**Iceland:** (1 team) (15 (16) 0/15)

Reykjavik, National University Hospital, Dept. of Hematology, CIC 605, S. Reykdal (15 (16) 0/15)

**Iran:** (4 teams) (505 (515) 312/193)

Shiraz, Nemazee Hospital, Bone Marrow Transplantation Unit, CIC 188, M. Ramzi (64 (68) 17/47)  
Tehran, Shariati Hospital, Oncology-Hematology, BMT Unit, CIC 633, A. Ghavamzadeh, M. Jahani (374 (380) 281/93)  
Tehran, Taleghani Hospital, Shahid Beheshti University, CIC 916, M. Mehdizadeh (67 (67) 14/53)  
Urmia West Azerbaijan, Urmia Medical Sciences University, Hematology, CIC 923, D. Maleky (no report)

**Ireland:** (5 teams) (195(231) 72/123)

Cork, University Hospital Cork, Dept. of Haematology, O. Gilligan, M. Cahill (starting in 2012) (0 (0) 0/0)  
Dublin, Our Lady's Hospital for Sick Children, Oncology Dept., CIC 774, A. O'Meara, O. Smith (34 (51) 15/19)  
Dublin, St. Vincent's Hospital, CIC 541, J. Crown, K. Murphy, M. Connell (15 (15) 0/15)  
Dublin, St. James's Hospital, Trinity Medical School, CIC 257, C. Flynn, P. Browne (130 (149) 57/73)  
Galway, Galway University Hospitals, Haematology Department, CIC 408, M.O' Dwyer (16 (16) 0/16)

**Israel:** (9 teams) (658 (720) 373/285)

Haifa, Rambam Medical Center, Dept. of Hematology, CIC 345, J. Rowe (145 (149) 65/80)  
Jerusalem, Hadassah University Hospital, Dept. BMT, CIC 258, R. Or, S. Slavin (128 (141) 77/51)  
Petach-Tikva, Schneider Children's Medical Center of Israel, Pediatric BMT, CIC 755, J. Stein (35 (42) 21/14)  
Petach-Tikva, Beilinson Hospital, Hematology & BMT Department, CIC 409, M. Yeshurun (64 (70) 39/25)  
Rehovot, Kaplan Hospital, Hematology Institute, CIC 327, A. Beribi (5 (6) 0/5)  
Tel-Aviv, Tel-Aviv Sourasky Med. Center, BMT Unit, CIC 161, E. Naparstek (56 (68) 26/30)  
Tel-Aviv, Tel-Aviv Sourasky Medical Centre, Ped Hematology, CIC 670, M. Bitan (10 (10) 6/4)  
Tel-Hashomer, Chaim Sheba Medical Center, Dept. of Hematology, CIC 754, A. Nagler, A. Shimoni (188 (200) 119/69)  
Tel-Hashomer, Chaim Sheba Medical Center, Dept. Pediatric Hemato-Oncology, CIC 572, A. Toren, H. Golan, B. Bielorai (27 (34) 20/7)

**Italy:** (102 teams) (4096 (4853) 1559/2537)

Alessandria, S.S. Antonio e Biagio e C. Arrigo, Haematology Dept., CIC 825, A. Levis, M. Pini, S. Tamiazzo (45 (54) 16/29)  
Ancona, Ospedale Torrette di Ancona, Clinica Di Ematologia, CIC 788, M. Montanari, P. Leoni (60 (62) 21/39)  
Ancona, Azienda Ospedale Salesi Riuniti, Ped. Hematology/Oncology, P. Pierani (5 (5) 0/5)  
Ascoli Piceno, Mazzoni Hospital, Haematology Service, CIC 119, P. Galieni (32 (42) 7/25)  
Avellino, A.O.S. Giovanni Di Guglieimo, Div. Ematologia, CIC 789, N. Cantore, G. Storti (24 (25) 8/16)  
Avezzano (AQ), Ospedale Civile, F. Recchia (4 (4) 0/4)  
Aviano (PN), CRO Aviano, Medical Oncology, CIC 162, M. Michieli, M. Rupolo, M. Mazzucato, F. Lollo (32 (43) 0/32)  
Bari, Università degli Studi di Bari, Ematologia con Trapianto, CIC 649, G. Specchia, D. Pastore (48 (49) 17/31)  
Bergamo, Ospedali Riuniti di Bergamo, Div. di Ematologia, CIC 658, A. Rambaldi (104 (116) 42/62)  
Bologna, Hospital St. Orsola-Malpighi, Inst. Haematology, CIC 240, G. Bandini, F. Bonifazi, M. Baccarani (125 (150) 50/75)

Bologna, Istituto Ortopedico Rizzoli, Dept. Muscolo-Skeletal Oncology, CIC 453, M. Abate (14 (14) 0/14)\*  
Bologna, University of Bologna, Clinica Pediatrica III, CIC 790, A. Pession, A. Prete (29 (34) 19/10)  
Bolzano, Hospital San Maurizio, Dept. of Hematology, CIC 299, S. Cortelazzo, M. Casini, I. Cavattoni (73 (74) 26/47)  
Brescia, Azienda Spedali Civili, Trapianto di Midollo, CIC 288, G. Rossi, C. Almici (94 (131) 0/94)  
Brescia, Univ. degli Studi di Brescia, Clinica Pediatrica, CIC 741, F. Porta, A. Ugazio (23 (26) 20/3)  
Brescia, Azienda Ospedali Civili, Trapianto di Midollo, CIC 141, D. Russo, C. Bergonzi (27 (28) 27/0)  
Brindisi, Ospedaliera 'A. Di Summa', Perrino Hospital, Dept. of Haematology, CIC 920, G. Quarta, S. Pinna (15 (18) 3/12)  
Busto -Arsizio, Ospedale di Circolo di Busto Arsizio, Oncologia Medica, CIC 927, M. Bregni (10 (12) 0/10)  
Cagliari, Ospedale A. Businco, Div. Ematologia, CIC 791, E. Angelucci,, D. Baronciani, C. Depau, F. Culurgioni (42 (50) 20/22)  
Cagliari, P.O.R. Binaghi, Pediatric Transplant Centre, CIC 811:2, M. Orofino, M. Addari (10 (11) 9/1)  
Cagliari, P.O. R. Binaghi, Centro Trapianti di Midollo Osseo, CIC 811:1, G. La Nasa (24 (29) 12/12)  
Catania, Ospedale Ferrarotto, University of Catania, Unita Trapianto di Midollo, CIC 792, G. Milone (36 (39) 15/21)  
Catania, University of Catania, Ped. Hematology/Oncology, CIC 836, L. Lo Nigro (4 (4) 1/3)  
Civitanova Marche, Ospedale di Civitanova Marche, Unita'Operative Di Medicina Interna, CIC 419, R. Centurioni (14 (15) 0/14)  
Cremona, Ospedale Maggiore, Medicina II, Sez. di Ematologia, BMT Unit, CIC 226, F. Lanza, P. Spedini, M. Tajana (11 (16) 0/11)  
Cuneo, Az. Osp. "S. Croce e Carle", Div. di Ematologia, CIC 606, A. Gallamini, N. Mordini (36 (41) 18/18)  
Ferrara, St. Anna Hospital, Hem, University of Ferrara, CIC 330, A. Cuneo, G. Daghia, S. Moretti, GM. Rigolin (19 (27) 0/19)  
Firenze, Ospedale di Careggi, Div. Ematologia, CIC 304, A. Bosi, S. Guidi, D. Caselli, G. Bernini (110 (129) 44/66)  
Foggia, Ospedale Riuniti di Foggia, Ematologia, S. Capalbo (10 (10) 0/10)  
Genoa, Istituto Giannina Gaslini, Dept.Onco/Hematology, CIC 274, G. Dini, E. Lanino (40 (50) 20/20)  
Genova, Ospedale San Martino, Div. Ematologia, CIC 217, A. Bacigalupo (126 (127) 104/22)  
Genova, Az. Opedale Universitaria San Martino, Haematology 1a, CIC 987, A. Carella (22 (27) 1/21)  
Genova, University of Genova, Dept. of Internal Medicine, CIC 139, F. Patrone, A. Ballestrero (22 (27) 0/22)  
Latina, Ospedale S. Maria Goretti, Div. di Ematologia, CIC 379, A. De. Blasio, E. Zappone (20 (27) 0/20)  
Lecce, Ospedale Vitofazzi di Lecce, Hematology, CIC 868, N. Di Renzo (26 (33) 2/24)  
Meldola, Istituto Scientifico Romagnolo, CIC 298, P. Fattori, F. Fabbri (27 (51) 0/27)  
Messina, Policlinico Univ. Messina Oncology-Pathology-Blood Center, Oncology-Pathology-Blood Center, CIC 669, V. Pitini (11 (14) 0/11)  
Milano, Ist. Scientifico H.S. Raffaele, BMT& Gene Therapy Program, CIC 813, F. Ciceri, M. Marcatti (130 (186) 75/55)  
Milano, Ospedale Maggiore di Milano, Inst. Medical Science, BMT, CIC 265, G. Lambertenghi Delilieri (34 (41) 14/20)  
Milano, Istituto Nazionale Tumori, CIC 616, P. Corradini, A. Gianni, R. Luksch (122 (152) 24/98)  
Milano, Ospedale di Niguarda, Div. di Ematologia, CIC 294, P. Marengo, R. Cairoli, G. Grillo (68 (78) 30/38)  
Milano, Istituto Europeo di Oncologia, , CIC 331, G. Martinelli (59 (69) 14/45)  
Milano, Ospedale Fatebenefratelli e Oftalmico, Div. Oncologia Medica, CIC 269, G. Farina, C. Bianchi, D. Pedretti (2 (2) 0/2)  
Milano, S. Carlo Borromeo Hospital, Oncology Department, CIC 683, L. Tedeschi (2 (2) 0/2)  
Milano Rozzano, 1st. Clinico Humanitas, Dept. Oncology-Hematology, CIC 354, L. Castagna, A. Santoro (82 (86) 31/51)  
Modena, University of Modena, Div. di Ematologia, CIC 543, F. Narni, A. Cuoghi, P. Bresciani (48 (59) 14/34)  
Monza, Ospedale S. Gerardo de 'Tintori, Div. di Ematologia, CIC 544, P. Pioltelli, E. Pogliani, M. Parma (56 (69) 23/33)  
Monza, Ospedale San Gerardo, Dept. Ped. Hematology, CIC 279, A. Rovelli (31 (32) 29/2)  
Naples, National Cancer Institute, Hem-Oncology, CIC 839, A. Pinto, G. Marcacci (31 (44) 0/31)  
Napoli, Cardarelli Hospital, Div. of Hematology, CIC 607, F. Ferrara, S. Palmieri (43 (48) 0/43)

Napoli, Hospital "Pausilipon", Hematology Pediatrics, CIC 341, V. Poggi, M. Ripaldi (24 (25) 13/11)  
Napoli, "Federico II" University, Div. of Hematology, CIC 766, A. Ristano, G. De Rosa, F. Pane (37 (42) 12/25)  
Nocera Inferiore, Ospedale Umberto I Nocera Inferiore, U.O. Medicina Interna Oncoematologia, A. D'Arco (12 (12) 0/12)  
Novara, Ospedale Maggiore della Carità, Ematologia, G. Galdano (29 (42) 2/27)  
Nuoro, Ospedale San Francesco, Div. Ematologia, CIC 793, A. Gabbas, A. Palmas (7 (10) 0/7)  
Padova, Istituto Oncologico Veneto (IVO)- IRCCS, Oncologia Medica II, CIC 319, S. Aversa, D. Marino, A. Jirillo, F. Canova, C. Trentin (7 (8) 0/7)  
Padova, Centro Leucemie Infantili, Onco-Hematology Division, CIC 285, C. Messina, M. Pillon, E. Calore (33 (36) 23/10)  
Padova, Padua University Hospital, Hematology, CIC 853, G. Semenzato (new in 2012)  
Palermo, University of Palermo, Div. di Ematologia, CIC 814, V. Abbadessa (no report)  
Palermo, Ospedale dei Bambini 'G. Di Cristina', , CIC 109, O. Ziino (4 (5) 1/3)  
Palermo, Ospedale V. Cervello - USL 60, Div. di Ematologia, CIC 392, R. Scimè, A. Cavallaro (54 (75) 20/34)  
Palermo, Ospedale "La Maddalena", , CIC 692, M. Musso, F. Porretto, A. Crescinanno (63 (86) 13/50)  
Palermo, ARNAS Civico Di Cristina Benfratelli, U.O.Ematologia, CIC 157, G. Pagnucco (11 (14) 0/11)\*  
Parma, Università degli Studi, Cattedra di Ematologia, CIC 245, V. Rizzoli, M. Mangoni (19 (26) 1/18)  
Pavia, IRCCS Policlinico San Matteo, Div. Ematologia, CIC 286, E.P. Alessandrino (96 (119) 30/66)  
Pavia, Policlinico S. Matteo, Clinica Pediatrica, CIC 557, M. Zecca (35 (42) 29/6)\*  
Pavia, Fondazione S. Maugeri, Div. di Oncologia Medica, CIC 771, A. Zambelli, G. Robustelli della Cuna (7 (12) 0/7)  
Perugia, Ospedale Santa Maria della Misericordia, Sezione de Ematologia, CIC 794, A. Velardi (106 (106) 32/74)  
Pesaro, Ospedale San Salvatore, Div. Ematologia, CIC 529, G. Visani (40 (48) 16/24)  
Pescara, Ospedale Civile, Div. di Ematologia, CIC 248, P. di Bartolomeo (53 (55) 39/14)  
Piacenza, Ospedale Civile - Piacenza, First Div. Onco-Hematology, CIC 163, L. Cavanna (22 (26) 10/12)  
Pisa, Azienda Osp. Universitaria Pisana, Unità Operativa Oncoematologia Pediatrica, CIC 795, E. Benedetti, C. Favre (73 (75) 27/46)  
Potenza, Ospedale "San Carlo" di Potenza, Ematologia, CIC 861, A. Olivieri, M. Cimminiello (25 (27) 4/21)  
Ravenna, Ospedale Civile, Medcal Oncology Unit, CIC 306, E. Ruffa (26 (34) 0/26)  
Reggio Calabria, Azienda Ospedaliera Alberto Neri, Centro Trapianti Midollo Osseo, CIC 587, G. Messina (56 (74) 21/35)  
Reggio Emilia, Arcispedale S. Maria Nuova, Unità Operativa Ematologia, CIC 660, F. Merli (40 (40) 7/33)  
Rimini, Ospedale 'Infermi di Rimini', BMT Unit USL 113, CIC 865, M. Imola (23 (32) 0/23)  
Rionero in Vulture, Centro di Riferimento Oncologico della Basilicata, Hematology and Stem Cell Transplantation, CIC 185, P. Musto, N. Di Renzo (13 (19) 0/13)  
Roma, Università "La Sapienza", Istituto Ematologia, CIC 232, R. Foa, G. Meloni (87 (99) 20/67)  
Roma, Università Cattolica S. Cuore, Ist. Semeiotica Med., CIC 307, S. Sica, G. Leone (65 (70) 21/44)  
Roma, Ospedale San Camillo, Hematology and BMT Unit, CIC 287, I. Majolino, A. Locasciulli (40 (43) 23/17)  
Rome, University of Rome 'Tor Vergata', Rome Transplant Network, CIC 756, W. Arcese, P. De Fabritis (234 (263) 142/92)  
Rome, IRRCS Ospedale Pediatrico, Bambino Gesù, CIC 796, F. Locatelli (new in 2012)  
Rome, International Centre for Transplantation, Policlinico Tor Vergata, CIC 383, G. Lucarelli, J. Gaziev (22 (22) 22/0)  
Salerno, AOU San Giovanni di Dio e Ruggi D'Aragona Hospital, Hem SCT Center, CIC 928, C. Selleri starting in 2012 (0 (0) 0/0)  
San Giovanni Rotondo, Ospedale IRCCS Casa Sollievo, Divisione di Ematologia, CIC 526, N. Cascavilla, A.M. Carellai, M. Greco (62 (76) 27/35)  
Sassari, Università Di Sassari, Istituto Di Ematologia, CIC 870, M. Longinotti, L. Podda (14 (16) 0/14)  
Siena, Azienda Ospedaliera Universitaria Senese, Policlinico S.Maria alle Scotte, Ematologia, CIC 321, G. Marotta (27 (36) 8/19)  
Taranto, Ospedale Nord, Reparto Ematologia, CIC 332, P. Mazza, G. Palazzo, B. Amurri (30 (31) 14/16)  
Torino, Azienda Ospedaliera S. Giovanni, Ematologia, CIC 231, M. Falda, F. Locatelli, B. Benedetto (144 (186) 55/89)

Torino, Ospedale Regina Margherita, Inst. di disc. pediatriche, CIC 305, F. Fagioli, E. Vassallo, M. Aglietta (79 (99) 53/26)

Torino, Az. Osp. Ordine Mauriziano Umberto 1, Ematologia, CIC 455, C. Tarella (8 (15) 0/8)

Treviso, Presidio Ospedaliero Treviso, Unita Operativa di Ematologia, CIC 415, F. Ghelinzoni (39 (41) 0/39)

Tricase (Lecce), Hospital C. Panico, Hematology, CIC 652, V. Pavone (36 (43) 10/26)

Trieste, Istituto per l'Infanzia Burlo Garofolo, Clinical Pediatrica, CIC 525, M. Rabusin (9 (9) 9/0)\*

Udine, Azienda Ospedaliero Universitaria di Udine, Ematologia, CIC 705, R. Fanin (73 (85) 39/34)

Varese, Ospedale do Circolo e Fondazione Macchi, Oncologia, CIC 878, C. Chini (6 (7) 0/6)\*

Venezia, Ospedale Civile SS. Giovanni e Paola, Div. di Ematologia, CIC 502, R. Bassan, M. Vespignani, M. Chinello (8 (10) 0/8)

Verbania-Pallanza, Ospedale di Verbania - ASL 14, Oncologica, CIC 385, A. Luraschi (3 (3) 0/3)

Verona, Policlinico G.B. Rossi, Cattedra Ematologia, CIC 623, F. Benedetti (66 (74) 36/30)

Vicenza, Ospedale S. Bortolo, Stabilimento di Ematologia, CIC 797, R. Raimondi, F. Rodeghiero (47 (53) 24/23)

**Jordan:** (1 team) (91 (95) 51/40)

Amman, King Hussein Cancer Centre, Hematology, CIC 580, F. Abdelrahman, A.A. Hussein (91 (95) 51/40)

**Latvia:** (1team) (13 (15) 2/11)

Riga, Clinic Linezers, National Haematology Centre, CIC 583, S. Lejniece (13 (15) 2/11)

**Lebanon:** (1 team) (39 (45) 11/28)

Beirut, American University of Beirut, Dept of Internal Medicine, CIC 369, A. Bazarbachi (39 (45) 11/28)

**Lithuania:** (2 teams) (137 (156) 66/71)

Vilnius, Vilnius University Children's Hospital, Onco-Haematology, CIC 508, J. Rascon (10 (10) 6/4)

Vilnius, University Hospital Santariskiu Klinikos, Dept. of Haematology, CIC 644, A. Slobinas, I. Trociukas (127 (146) 60/67)

**Luxemburg:** (1 team) (16 (18) 0/16)

Luxembourg, Centre Hospitalier, Dept. of Hemato-Oncology, S. De Wilde (16 (18) 0/16)

**Macedonia:** (1 team) (22 (22) 6/16)

Skopje, University St. Cyrilius, Hematology Clinic, CIC 381, B. Georgievski (22 (22) 6/16)

**Netherlands:** (16 teams) (1046 (1122) 510/536)

Amsterdam, VU University Medical Center, Pediatrics, CIC 588:2, E. Meijer, J.J.W.M. Janssen (5 (6) 0/5)

Amsterdam, Academic Medical Center, Adults, CIC 247, M.J. Kersten, J. Zsiros (64 (66) 27/37)

Amsterdam, VU University Medical Center, Adults, CIC 588, J.J.W.M. Janssen, G.J. Ossenkoppele (174 (179) 82/92)

Amsterdam, Antoni Van Leeuwenhoek Hospital, , CIC 976, S. Rodenhuis J. Baars (16 (25) 0/16)

Enschede, Medisch Spectrum Twente, , CIC 360, M.R. Schaafsma (25 (29) 0/25)

Groningen, University Hospital Groningen, Dept. of Hematology, CIC 546, G van Imhoff (101 (105) 41/60)

Leiden, University Medical Center, Dept. Hematology, CIC 203, J.H.Veelken, M. Egeler (130 (139) 105/25)

Maastricht, Academic Hospital Maastricht, Hematology, CIC 565, H.C. Schouten, J. Wagstaff (92 (95) 54/38)

Nieuwegein, St. Antonius Hospital, Dept. of Internal Medicine, CIC 200, H.K. Koene, G. Veth, O. de Weerd (28 (29) 1/27)

Nijmegen, Radboud University Nijmegen Medical Centre, Afd: Bloedziekten, CIC 237, N. Schaap, P. Hoogerbrugge (89 (95) 41/48)

Rotterdam, Daniel den Hoed Cancer Center, , CIC 246, J.J. Cornelissen (176 (177) 73/103)

Rotterdam, Erasmus MC- Sophia Children's Hospital, Department of Pediatric Oncology/Hematology, CIC 998, M. van der Heuvel (5 (9) 0/5)

The Hague, Haga Hospital Leyenburg, , CIC 547, P.W. Wijermans (7 (7) 0/7)

Utrecht, University Hospital for Children UMCU/WKZ, Dept. of Haematology, CIC 239:2, M. Bierings (33 (35) 30/3)  
Utrecht, University Medical Centre UMCU, Dept. of Haematology, CIC 239:1, E. Petersen (88 (112) 56/32)  
Zwolle, Isala Kliniecken, Sophia Ziekenhuis, , CIC 548, M. von Marwijk Kooy (13 (14) 0/13)

**Nigeria:** (1 team) (1 (1) 1/0)

Benin Edo, University of Benin Teaching Hospital, Hematology, CIC 907, G.N. Bazuaye (1 (1) 1/0)

**Norway:** (5 teams) (198 (232) 81/117)

Bergen, Haukeland Universitets Sjukehus, Dept. of Hematology, CIC 197, M. Sjo (25 (35) 10/15)  
Oslo, Oslo University Hospital, Rikshospitalet, Dept., Hematology, CIC 235, L. Brinch, A. Glomstein (100 (112) 66/34)  
Oslo, Rikshospitalet Radiumhospitalet, , CIC 782, G. Lauritzen, S. Kvaloy (47 (49) 5/42)  
Tromso, University Hospital of Northern Norway, Hematology, A. Vik (5 (12) 0/5)  
Trondheim, St. Olavs Hospital, Dept. of Hematology, J. Hammerstrom, A. Waage (21 (24) 0/21)

**Poland:** (18 teams) (984 (1115) 347/637)

Bydgoszcz, Collegium Medicum UMK, Ped Hem/Oncology, CIC 764, M. Wysocki, J. Stycznski (28 (34) 22/6)  
Cracow, University Children's Hospital, Polish American Inst. Peds, CIC 507, J. Gozdzik (15 (17) 14/1)  
Cracow, Medical Faculty Jagrellonian University, Dept. of Hematology, CIC 553, A. Skotnicki, B. Pitkowska-Jakubas (62 (71) 10/52)  
Gdansk, Akademickie Centrum Kliniczne, Klinika Hematologi, CIC 799, A. Hellmann (67 (67) 25/42)  
Gliwice, Maria Sklodowska Curie Memorial Cancer Centre, Centre of Oncology, CIC 428, S. Giebel (123 (158) 0/123)  
Katowice, Medical University of Silesia, University Dept. Haematology, CIC 677, S. Kyrzcz-Krzemien (163 (197) 86/77)  
Lodz, Medical University of Lodz, Dept. of Haematology, CIC 171, T. Robak (39 (40) 0/39)  
Lublin, University Medical School, Dept. of Haematology, CIC 695, A. Dmoszynska, M. Wach, A. Walter-Croneck, W. Legiec (55 (71) 2/53)  
Lublin, Children's University Hospital, Pediatric Hematology/Oncology, CIC 678, J. Kowalczyk (9 (10) 7/2)  
Poznan, K. Marcinkowski University, Dept. of Hematology, CIC 730, M. Komarnicki (87 (94) 48/39)  
Poznan, Institute of Pediatrics, 1st Clinic, BMT Unit, CIC 641, J. Wachowiak (22 (22) 17/5)  
Warsaw, Central Hospital Military Medical Academy, BMT Unit, CIC 816, P. Rzepecki, K. Sulek, C. Szczylik (34 (36) 4/30)  
Warsaw, Maria Sklodowska Curie Memorial Institute, Lymphoma Dept. A, CIC 800, J. Walewski (41 (42) 0/41)  
Warsaw, Central Clinical Hospital Medical University of Warsaw, Dept. of Haematology/Oncology, CIC 954, W. Wiktor-Jedrzejczak, A. Deptala, M. Rokicka (68 (75) 22/46)  
Warszawa, Institute of Hematology and Blood Transfusion, Stem Cell Transplantation, CIC 693, B. Marianska, B.Nasilowska-Adamska, A. Tomaszewska, M. Szczepinski (33 (35) 17/16)  
Wroclaw, University of Medicine, Dept. of Children Hematology, CIC 817, A. Chybicka, J. Owoc-Lempach (51 (57) 39/12)  
Wroclaw, Medical Academy, Dept. of Hematology, CIC 699, K. Kuliczkowski (52 (53) 16/36)  
Wroclaw, K. Dluski Hospital, Lower Silesian Centre for Cellular Transplantation, CIC 538, A. Lange (35 (36) 18/17)

**Portugal:** (6 teams) (380 (429) 119/261)

Coimbra, Hospital Geral, Univ. de Coimbra, Unidade de Terapia Celular, CIC 164, A. do CénTeixeira, I. Costa (no report)  
Lisboa, Instituto Portugues de Oncologia, BMT Unit, CIC 300, M. Abecasis (80 (84) 26/54)  
Lisboa, Hospital de St. Antonio dos Capuchos, Serv. de Hematologia, CIC 826, A. Botelho de Sousa (48 (63) 0/48)  
Lisbon, Hospital de Santa Maria, BMT Unit, CIC 636, J. Alves do Carmo, F. de Lacerda (75 (87) 36/39)  
Porto, Instituto Portugues de Oncologia, BMT Unit, CIC 291, A. Botelho de Sousa (136 (151) 57/79)  
Porto, Hospital S. Joao, Unidade de Hematologia Clinica, CIC 329, J.E. Guimaraes, F. Principe (41 (44) 0/41)

**Republic of Belarus:** (2 teams) (137(148) 110)

Minsk, Belorussian Centre, Ped. Oncology & Hematology, CIC 591, O. Aleinikova (47 (50) 20/27)

Minsk, Hospital No. 9, Belorussian Transplant Centre, N. Milanovich (90 (98) 7/83)

**Romania:** (4 teams) (166 (180) 19/147)

Bucharest, Fundeni University Hospital, 2nd department of Hematology, CIC 454, A. Moicean (no report)

Bucharest, Fundeni Clinical Institute, Clinic of Hematology, CIC 427, D. Colita, C. Arion (77 (84) 11/66)

Targu-Mures, Sectia Clinica de Hematologie si, Transplant de Maduva, CIC 178, I. Benedek (57 (58) 1/56)

Timisoara, Emergency Childrens Hospital 'Louis Turcanu', III Paed. Clinic Hemato-Onco, CIC 174, M.

Serban, C. Jinca (32 (38) 7/25)

**Russia:** (15 teams) (554 (633) 189/365)

Ekaterinburg, Regional Hospital No 1, Hematology Dept., T.S. Konstantinova, V.A. Shalaev (30 (44) 4/26)

Moscow, Burnasyan Federal Medical Biophysical Center, Dept. of acute radiation pathology, A.A.

Davyan, A.E. Baranov (32 (39) 2/30)

Moscow, Cancer Research Center, Dept. of Hematology, K.N. Melkova (30 (32) 4/26)

Moscow, Cancer Research Center, Inst. for Pediatric Oncology, G. Mentkevich (19 (19) 5/14)

Moscow, Center of RAS Research Hematological, , CIC 930, V.G. Savtchenko (47 (60) 10/37)

Moscow, Main Military Clinical Hospital, Dep. of Intensive Chemotherapy & BMT, S.V. Shamansky, O.A. Rukavitsyn (9 (9) 0/9)

Moscow, Pirogov Medical Surgical Centre, Clinic of Hematology, CIC 520, A. Novik, D.A. Fedorenko (75 (75) 1/74)

Moscow, Russian Children's Hospital, Dept. of Bone Marrow Transplant, CIC 694, A. Maschan, E.

Skorobogato, E. Pachanov (47 (52) 27/20)

Novosibirsk, Inst. of Clinical Immunology, CIC 376, I. Lisukov (20 (22) 0/20)

Samara, Regional Hospital, Hematology Dept., V.A. Rossiev (12 (12) 0/12)

St. Petersburg, Russian Inst. of Hematology, Dept. Clin. Hematology, K.M. Abdulkadyrov (19 (25) 2/17)

St. Petersburg, State Pavlov Medical University, Dept. of BMT, Hematology, CIC 725, B.V. Afanasyev, L. Zubarovskaya (174 (202) 128/46)

St. Petersburg, V. A. Almazov Federal Centre, Hematology, CIC 925, A. Zaritskey, D. Motorin (40 (42) 6/34)

St. Petersburg, Leningrad Regional Clinical Hospital, Dept. of BMT, I. Zyuzgin (no report)

Yaroslavl, Regional Clinical Hospital, Dep. of Hematology, V. A. Lapin (no report)

**Saudi Arabia:** (3 teams) (252 (255) 171/81)

Riyadh, Riyadh Armed Forces Hospital, (C-751) RKH Programme, CIC 818, A. Alabdulaaly (6 (6) 5/1)

Riyadh, King Faisal Specialist Hospital, Ads Oncology/Haematology, CIC 397, M. Al Jurf (109 (112) 48/61)

Riyadh, King Faisal Specialist Hospital, Ped Oncology/Haematology, CIC 397, M. Ayas (137 (137) 118/19)

**Serbia:** (4 teams) (88 (93) 23/65)

Belgrade, Clinical Centre of Serbia, Institute of Hematology, CIC 373, J. Bila, M. Todorovic (no report)

Belgrade, Military Medical Academy, Clinic of Hematology, CIC 582, D. Stamatovic (66 (70) 13/53)

Novi Beograd, Mother & Child Health Institute, , CIC 358, D. Vujic (18 (19) 9/9)

Novi Sad, Institute of Internal Diseases, Clinic of Hematology, CIC 655, S. Popović (4 (4) 1/3)

**Slovakia:** (5 teams) (188 (204) 63/125)

Banska Bystrica, Roosevelt Hospital, Dept. of Hematology, CIC 333, I. Markuljak, E. Kralikova (8 (13) 0/8)

Bratislava, National Cancer Institute, , CIC 560, J. Lakota (71 (71) 11/60)

Bratislava, University Hospital, 2nd Children's Clinic, CIC 684, S. Sufliarska, J. Horàková, I. Bodova (20 (22) 17/3)

Bratislava, University Hospital, Clinic of Hematology, CIC 610, M. Mistrik (68 (77) 35/33)

Kosice, University Hospital L. Pasteura Kosice, Hem-Oncology, CIC 984, E. Tothova (21 (21) 0/21)

**Slovenia:** (1 team) (80 (95) 26/54)

Ljubljana, University Medical Centre, Dept. Haematology, CIC 640, J. Pretnar (80 (95) 26/54)

**South Africa:** (6 teams) (217 (223) 120/97)

Cape Town, Constantiaberg Medi-Clinic, Haematology & BMT Unit, CIC 772, A. Abayomi, S. Nahrwar (34 (37) 15/19)

Cape Town, UCT Medical School, Clin. Haematology 6.06 Chris Barnard Building, CIC 512, N. Novitzky, C. du Toit (29 (29) 19/10)

Cape Town, UCT Private Academic Hospital, BMT Unit, CIC 512, N. Novitzky (26 (28) 14/12)

Durban - Mayville, Inkosi Albert Luthuli Central Hospital (IALCH), Haematology, JP. Singh (11 (11) 6/5)

Johannesburg, Donald Gordon Medical Centre, P. Ruff, D. Moodley (13 (13) 2/11)

Pretoria Gauteng, Albert Aberts Stem Cell Transplant Unit, Haematology Pretoria East Hospital, CIC 456, J. Thomson, D. Brittain (104 (105) 64/40)

**Spain:** (74 teams) (2431 (2585) 887/1544)

Alicante, Hosp. General de Alicante, Serv. Hematologia, C. Rivas-Gonzales (31 (31) 0/31)

Barakaldo (Bilbao), Hospital de Cruces, Hematologia, CIC 393, I. Zuazua-Verde, F. Floristan (45 (51) 0/45)

Barcelona, Hospital de la Santa Creu i Sant Pau, Dept. of Pediatrics, CIC 260:2, I. Badell Serra, N. Pardo, M. Torrent (8 (8) 6/2)

Barcelona, Hospital de la Santa Creu i Sant Pau, Dept. of Hematology, CIC 260, J. Sierra, S. Brunet (95 (104) 43/52)

Barcelona, Institut Català d'Oncologia, Hosp. Duran i Reynals, CIC 759, R. F. Duarte., A. Fernández, I. Sánchez-Ortega. M. Arnan (60 (62) 18/42)

Barcelona, Hospital Vall d'Hebron, Unidad de Adultos, CIC 584, D. Valcarcel (55 (56) 26/29)

Barcelona, Hospital Clinic, Servei d'Hematologia, CIC 214, M. Rovira (101 (103) 45/56)

Barcelona, Hospital Vall d'Hebron, Hematologia y Oncologia Pediatrica, CIC 422, J. Sanchez de Toledo Codina, C. Diaz de Heredia, T. Olivé, I. Ebeza (34 (37) 26/8)

Barcelona (Badalona), Hospital Universitario Germans Trias i Pujol, CIC 613, J. Ribera (51 (55) 30/21)

Barcelona (Esplugues), Hospital Saint Joan de Deu, CIC 668, J. Estella Aguado (5 (13) 0/5)

Barcelona (Terrassa), Hospital Mutua de Terrassa, J.M.Marti Tutusaus (18 (20) 0/18)

Caceres, Hospital "San Pedro de Alcantara", CIC 430, J. Prieto (28 (28) 0/28)

Cadiz, Hospital Universitario 'Puerta del Mar', Serv. de Hematologia, CIC 679, J. Muñoz Muñoz (9 (9) 0/9)

Cadiz, Jerez de la Frontera, Hospital de Jerez, Serv. Hematologia, CIC 612, S. Garzon (48 (48) 17/31)

Canary Isles, Las Palmas de Gran Canaria, Hosp. Insular de Gran Canaria, Serv. de Hematologia, CIC 335, J. Gonzalez-San Miguel (20 (20) 0/20)

Canary Isles, Las Palmas de Gran Canaria, Hospital Materno-Infantil, Serv. Hematologia Pediatrica, D. José Carlos (0 (0) 0/0)

Canary Isles, Las Palmas de Gran Canaria, Hospital Universitario de Gran Canaria 'Dr. Negrin', Dept. of Haematology, CIC 537, T. Molero, S. Jiménez, C. Campo, A. Suárez, H. Luzardo (24 (31) 15/9)

Canary Isles, Tenerife, La Laguna, Hospital Universitario de Canarias, CIC 855, L. Hernandez Nieto, M.T. Hernandez Garcia (20 (21) 0/20)

Canary Isles, Tenerife, Santa Cruz de Tenerife, Hosp. N.S. de la Candelaria, J. Garcia-Talavera, J. Breña, P. Rios Rull (16 (16) 0/16)

Castellon de la Plana, Hosp. General de Castellon, Serv. Hematologia., R. Garcia-Boyero (10 (10) 0/10)

Cordoba, Hospital Reina Sofia, Serv. Hematologia, CIC 238, A. Torres Gomez (69 (73) 36/33)

Donostia, San Sebastian, Hospital Nostra Senora de Aranzazu, Serv. Hematologia, CIC 598, R. Lasa, J. Marin, D. Martinez (31 (36) 11/20)

Galdakao (Vizcaya), Galdakao Hospital, Serv. Hematologia, CIC 975, T. Carrascosa Vallejo, J. Ojanguren, K. Atutxa (13 (13) 0/13)

Girona, Hospital Josep Trueta, Institut Català d'Oncologia, CIC 433, D. Gallardo (16 (16) 0/16)

Granada, Hospital Virgen de Las Nieves, Serv. Hematologia, CIC 559, M. Jurado Checon (39 (40) 22/17)

Jaen, Hosp. Ciudad de Jaen, Serv. Hematologia, P. González (18 (18) 0/18)

La Coruna, Complejo Hosp. Universitario A. Coruna, Serv. Hematologia, CIC 361, F.J. Batlle, C.

Ramirez, P. Torres, R. González-Rodríguez, R. Varela (49 (51) 18/31)

Leon, Hospital de Leon, Hematology Department, CIC 426, F. Ramos, C. Cecchini, N. De las Heras, C. Alvarez (11 (12) 0/11)

Lleida, Hosp. Arnau de Villanova, Serv. Hematologia, J. Macia (6 (6) 0/6)

Logrono (La Rioja), Hospital San Pedro, , CIC 917, P. Rabasa Baraibar (12 (12) 0/12)

Lugo, Hosp. Xeral-Calde, Serv. Hematologia, CIC 371, M. Gonzales-Lopez (14 (14) 0/14)

Madrid, Hospital La Paz Infantil, Serv. Hematología, CIC 734, A. Martínez-Rubio, A. Sastre (40 (40) 18/22)  
Madrid, Hospital Univ. Materno Infantil Gregorio Marañón, Oncohematología Pediátrica, CIC 410, C. Belendez (5 (6) 4/1)  
Madrid, Hospital Univ. San Carlos, Serv. Hematología, CIC 733, J. Díaz Mediavilla, L. Llorente, R. Martínez (24 (24) 0/24)  
Madrid, Hospital Gregorio Marañón, Unidad de TMO-Onc 4a, CIC 819, J.L. Díez Martín, P. Balsalobre, J. Gayoso, D. Serrano, I. Buño, A. Gómez-Pineda, C. Muñoz (57 (62) 36/21)  
Madrid, Clínica Puerta de Hierro, Serv. Hematología, CIC 728, JR. Cabrera Marín (36 (40) 26/10)  
Madrid, Hospital de la Princesa, Dept. of Hematology, CIC 236, A. Figuera, A. Alegre (47 (51) 20/27)  
Madrid, Clínica Moncloa, Serv. Hematología, J.M. Fernández-Rañada, A. Escudero (10 (10) 0/10)  
Madrid, Hospital Ramón y Cajal, Serv. Pediatría, CIC 615, J. López-Jiménez (64 (64) 25/39)  
Madrid, Hospital Príncipe Asturias, Alcalá de Henares, Serv. Hematología, JJ. Gil Fernández, C. Burgaleta (8 (8) 0/8)  
Madrid, Hospital Doce de Octubre, Serv. Hematología, CIC 382, J.J. Lahuerta, J. De la Serna (50 (50) 4/46)  
Madrid, Hospital Univ. de Getafe, Serv. Hematología, CIC 852, F. Oña Compañ, N. Somolinos, L. García Alonso (11 (11) 0/11)  
Madrid, Hospital del Niño Jesús, Serv. Oncología Ped., CIC 732, M.A. Díaz (38 (46) 32/6)  
Madrid, Hospital Quirón Madrid, Serv. Pediatría, L. Madero, D. Escudero (no report)  
Madrid, Hospital Universitario La Paz, Hematología y Hemoterapia, CIC 734, R. Arrieta, M. Canales (17 (19) 15/2)  
Madrid, Hospital Universitario Sanchinarro, Dep Hematología, J. Pérez de Oteyza (14 (14) 0/14)  
Madrid, Fundación Jiménez Díaz, Serv. Hematología, CIC 309, J.L. López-Lorenzo, F. Lobo, M. Callejas (14 (14) 2/12)  
Madrid, Hospital Universitario Severo Ochoa, Hematología, P. Sánchez-Godoy (10 (10) 0/10)  
Madrid, Pozuelo de Alarcón, Hospital Quirón Madrid, Serv. Hematología, J.M. Fernández-Rañada, A. Escudero (21 (21) 4/17)  
Málaga, Carlos Haya Regional Hospital, Serv. Hematología, CIC 576, M. González, M. Pascual (87 (87) 37/50)  
Murcia, Hospital Universitario Virgen de la Arrixaca, Ctra. Cartagena, CIC 323, J.M. Moraleda, A. Morales-Lázaro, M.J. Majado-Martínez (46 (51) 17/29)  
Murcia, Hospital General Univ.-Morales Meseguer, CIC 735, V. Vicente-García, I. Heras (66 (68) 30/36)  
Orense, Complejo Hosp. Cristal-Pinor, Serv. Hematología, J-L. Sastre-Moral (12 (12) 0/12)  
Oviedo, Hospital Covadonga, Hematology Department, CIC 642, J-C. Vallejo (68 (81) 20/48)  
Palma de Mallorca, Hospital Universitari Son Espases, Serv. Hematología, CIC 722, J. Besalduch, M. Canaro (24 (29) 7/17)  
Palma de Mallorca Balearic, Hospital son Llatzer, CIC 110, J. Bargay-Lleonart (21 (21) 0/21)  
Pamplona, Hospital de Navarra, Serv. Hematología, CIC 577, E. Olavarria (51 (59) 18/33)  
Pamplona, Clínica Universitaria de Navarra, Serv. Hematología, CIC 737, J. Rifón (8 (11) 1/7)  
Pontevedra, Complejo Hospital Montecelo de Pontevedra, Serv. Hematología, CIC 549, A-M. Dios Loureiro (7 (11) 0/7)  
Salamanca, Complejo Hospital. de Salamanca, Serv. Hematología, CIC 727, D. Caballero (85 (94) 37/48)  
Santander, Hospital Universitario M. de Valdecilla, Serv. Hematología, CIC 242, A. Iriondo, E. Conde (78 (80) 52/26)  
Santiago d. Compostela, Hospital Xeral de Galicia, Serv. Hematología, CIC 570, J.L. Bello (36 (37) 20/16)  
Sevilla, Hospital Universitario Virgen del Rocío, Serv. de Hematología, CIC 769, I. Espigadot (88 (95) 35/53)  
Tarragona, Hospital de Tarragona Joan XXIII, Serv. Hematología, A. Llorente Cabrera (16 (17) 0/16)  
Valencia, Hospital Universitario La Fe, Dept. Pediatrics, CIC 653, A. Verdeguer, J. M. Fernández (17 (18) 10/7)  
Valencia, Hospital Clínico Universitario de Valencia, Serv. de Hematología, CIC 282, C. Solano, C. Arbona (66 (67) 21/45)  
Valencia, Inst. Valenciano de Oncología, Hematology service, I. Picon (8 (8) 0/8)  
Valencia, Hospital Arnau de Vilanova de Valencia, A. López, E. Cabrera-Espinos (4 (4) 0/4)  
Valencia, Hospital Doctor Peset, Serv. Hematología, P. Ribas García (13 (13) 0/13)  
Valencia, Hospital Universitario La Fe, Serv. de Hematología, CIC 663, M.A. Sanz, G.F. Sanz (108 (110) 59/49)



Valladolid, Hospital Rio Hortega, Serv. Hematologia, CIC 611, J. Garcia Frade (23 (26) 3/20)  
Vigo, Complejo Hospitalario Universitario de Vigo, Hematologia, CIC 421, C. Albo-Lopez (43 (46) 16/27)  
Zaragoza, Hospital "Miguel Servet", Serv. Hematologia, , D. Rubio-Félix, A. Anton (22 (24) 5/17)  
Zaragoza, Hospital Clinico, Haematology, CIC 531, L. Palomera Bernal (12 (12) 0/12)

**Sweden:** (7 teams) (636 (693) 239/397)

Gothenburg, CHECT, Sahlgrenska Univ. Hospital, CIC 289, M. Brune, A Fasth (104 (116) 45/59)  
Linköping, RIL, University Hospital, Dept. of Hematology, CIC 740, A. Sandstedt, C. Malm (67 (71) 24/43)  
Lund, University Hospital, Dept. of Hematology, CIC 283, S. Lenhoff (103 (111) 37/66)  
Orebro, Orebro Medical Center Hospital, Dept. Medecine & Transfusion, CIC 738, P. Kozlowski (29 (33) 0/29)  
Stockholm, Huddinge, Huddinge Hospital, Dept. Medicine, CIC 212, P. Ljungman (176 (180) 74/102)  
Umea, Umea University Hospital, Dept. of Internal Medicine, CIC 731, A. Wahlin, V. Lazarevic, J. Lindh, B. Markevärn (58 (64) 22/36)  
Uppsala, University Hospital, Dept of Hematology, CIC 266, K. Carlson (99 (118) 37/62)

**Switzerland:** (9 teams) (478 (569) 172/306)

Aarau, Kantonsspital Aarau, Abt. Onko-Hämatalogie, CIC 316, M. Wernli, M. Bargetzi (28 (32) 0/28)  
Basel, University Hospital Basel, Hematology, CIC 202, J. Passweg, D. Heim, J. Halter, T. Kühne (92 (108) 68/24)  
Bellinzona, Ospedale San Giovanni, Serv. oncologico, CIC 829, L. Wannesson, L. Leoncini (19 (20) 0/19)  
Bern, Inselspital Bern, Hematology, CIC 221, K. Leibundgut, M. Fey, T. Pabst, D. Baerlocher (86 (102) 0/86)  
Genève, Hôpital Cantonal Universitaire, Div. d'Onco-Hématologie, CIC 261, Y. Chalandon, M. Bernimoulin, H. Ozsahin, M. Ansari (40 (43) 40/0)  
Lausanne, CHUV, Div. d'Hématologie, CIC 820, M. Duchosal, A. Rosselet, S. Leyvraz (57 (66) 0/57)  
St. Gallen, Kantonsspital St. Gallen, Klinik C Inn. Med., CIC 324, U. Hess (22 (30) 0/22)  
Zürich, Universitätsspital, Med. Klinik, CIC 208, U. Schanz, C. Renner (119 (147) 49/70)  
Zürich, Universitäts-Kinderklinik, CIC 334, T. Güngör (15 (21) 15/0)

**Tunisia:** (1 team) (104 (108) 53/51)

Tunis, Centre National de Greffe de Moelle Osseuse, , CIC 183, B. Othman-Tarck (104 (108) 53/51)

**Turkey:** (48 teams) (1702 (1773) 776/926)

Adana-Balcali, Cukurova University Hospital Balcali, Pediatrics, Hematology, CIC 821, A. Tanyeli (no report)  
Adana-Yuregir, Baskent Univ. Adana Research & Training, Haematology, CIC 589, H. Ozdogu, C. Boga, S. Asma, S. Yuçe (50 (52) 17/33)  
Ankara, Ankara Oncology Research & Education Hospital, Hematology & Stem Cell Transplantation Unit, CIC 423:1, F. Altuntas (72 (80) 32/40)  
Ankara, Ankara Numune Education and, Research Hospital, CIC 691, G. Özet (28 (30) 0/28)  
Ankara, Ankara Bayinder Hospital, Haematology BMT, CIC 412, S. Dincer (41 (47) 17/24)  
Ankara, Hacettepe University Hospital, Institue of Oncology, CIC 292, E. Kansu, E. Özdemir (no report)  
Ankara, Private Medicana International Hospital, SCT Unit Hematology, CIC 862, M. Yüksel (0 (0) 0/0)  
Ankara -Yenisehir, Hacettepe University, Ihsan Dogramaci Children's Hosp., Pediatric Hematology, CIC 399, A. Tuncer, D. Uckan-Cetinkaya (21 (25) 21/0)  
Ankara-Besevler, Gazi Faculty of Medicine, Pediatric Hematology, CIC 182, U. Kocak (3 (3) 2/1)  
Ankara-Besevler, Gazi University, School of Medicine, Hematology, CIC 169, G. Sucak (67 (70) 26/41)  
Ankara-Cebeci, Cebeci Hospital, Med. Oncology, A. Demirkazik (5 (5) 0/5)  
Ankara-Cebeci, Ibn-i-Sina Hospital, Dept. Hematology, SCT Unit, CIC 617, G. Gürman (108 (109) 49/59)  
Ankara-Cebeci, University of Ankara, Dept. of Paediatrics, CIC 620, M. Ertem, E. Unal (28 (30) 25/3)  
Ankara-Diskapi, Childrens Hospital HSCT Centre, Pediatric Hematology, CIC 436, B. Tunc, M. Fatih-Azik (44 (45) 40/4)  
Ankara-Etlik, GATA BMT Center, Gülhane Military Med. Academy, CIC 372, F. Arpaci, A.U. Ural, E. Kürekci (39 (42) 11/28)  
Ankara-Sihhiye, Hacettepe University Med. School, Dept. of Hematology, CIC 168, H. Goker, O. Ozcebe, I. Haznedaroglu, S. Dundar (35 (35) 15/20)

Antalya, An - Deva Yıldız Hospital, Hematology, I. Karadögan (new in 2012)  
Antalya, Akdeniz University School of Medicine, Div. of Hematology, CIC 685, L. Undar (39 (39) 13/26)  
Antalya, Akdeniz University School of Medicine, Dept. of Ped. Hematology, CIC 618, M.A. Yesilipek, V. Hazar, A. Kupesiz (36 (37) 31/5)  
Antalya, Medical Park Hospitals, Stem Cell Transplant Unit, CIC 919, Y. Koc (65 (75) 33/32)  
Aydin, Adnan Menderes University Medical Faculty, Hematology Dept., CIC 187, Z. Bolaman, G. Kadikoylu (23 (24) 5/18)  
Diyarbakir, Dicle University Faculty of Medicine, Hematology, O. Ayyildiz (new in 2012)  
Erzurum, Atatürk University Faculty of Medicine, Hematology, Y. Bilem (0 (0) 0/0)  
Eskisehir, Osmangazi University, Faculty of Medicine, CIC 686, E. Gunduz (33 (35) 7/26)  
Gaziantep, Gaziantep University Medical School, Division of Haematology, CIC 402, M. Pehlivan (68 (71) 28/40)  
Görükle / Bursa, Uludag University Faculty of Medicine, Hematology, V. Özkocaman (new in 2012)  
Istanbul, Istanbul School of Medicine, Ped Hematology BMT, CIC 400, S. Anak (4 (4) 4/0)  
Istanbul, Florence Nightingale Sisli Hospital, Hem SCT Unit, CIC 994, M. Arat (96 (96) 28/68)  
Istanbul, Bahcelievler Medical Park Hospital, Adult HSCTU, S. Kalayoglu-Besisik (no report)  
Istanbul, Cerrahpasa Medical School, Hematology/BMT Unit, CIC 761, B. Ferhanoglu, T. Soysal, M. Cem Ar (40 (40) 15/25)  
Istanbul, Yeditepe University Hospital, Haematology Department, CIC 416, S. Karti (4 (4) 0/4)  
Istanbul, Medicalpark Bahcelievler Hospital, Ped Hematology, CIC 457, G. Öztürk, F. Erbey (44 (44) 40/4)  
Istanbul, Istanbul Tıp Fakültesi, İç Hastalıkları. Hematoloji Blim Dali, CIC 760, D. Sargin, S. Kalayoglu-Besisik (66 (67) 25/41)  
Istanbul-Kadıköy, Medical Park Göztepe Hospital, Hematology BMT Unit, CIC 929, G. Karasu (58 (58) 56/2)  
Istanbul-Kozyatagi, Acibadem Kozyatagi Hospital, Hematology BMT Unit, S. Ratip (12 (12) 0/12)  
Istanbul-Okmeydani, Memorial Hospital Sisli, Haematology Department, M. Cetiner (new in 2012)  
Izmir, Tepecik Research and Educational Hospital, Pediatric Hematology, H. Öniz (3 (3) 2/1)  
Izmir-Balcova, Dokuz Eylül University Faculty of Medicine, Pediatric Hematology, H. Ören, Ö. Tüfekci (11 (11) 9/2)  
Izmir-Bornova, Ege University Medical Faculty, Dept. of Hematology, Adults, CIC 628, S. Cagiran, F. Buyukkececi, M. Töbü, G. Saydam (96 (101) 29/67)  
Izmir-Bornova, Ege University Medical Faculty, Pediatric Hemato/Oncology Dept., CIC 621, S. Kansoy (38 (40) 34/4)  
Izmir-Incirtali, Dokuz Eylül University, Hematology, CIC 688, H. Özsan (47 (47) 13/34)  
Kayseri, Erciyes University Faculty of Medicine, Pediatric Hematology, M. Karakukcu (17 (18) 7/10)  
Kayseri, Erciyes University Faculty of Medicine, Dept. Hematology/Oncology, CIC 627, A. Unal, M. Cetin (121 (123) 43/78)  
Kocaeli, Anadolu Medical Centre Hospital, Hematology BMT Unit, Z. Gülbas (167 (178) 68/99)  
Malatya, Inonu University Hospital Turgut Özal Medical Centre, Haematology Department, CIC 437, M. Ali Erkurt (30 (30) 9/21)  
Samsun-Atakum, Ondokuz Mayıs University, Ped. Oncology, M. Elli, A. Yildiran, D. Albayrak, C. Albayrak, A. Dagdemir (22 (22) 18/4)  
Selcuk Konya, Selcuk University Faculty of Medicine, Haematology Department, A. Ugur Bilgin (new in 2012)  
Trabzon, Karadeniz Technical University, Haematology Department, CIC 170, M. Sonmez (21 (21) 4/17)

**Ukraine:** (2 teams) (67 (70) 6/61)

Kiev, Ukrainian Pediatric Hospital Ohmatdit, CIC 177, S. Donska, O. Ryzhak (17 (17) 6/11)  
Kiev, Kiev City BMT Center, BMT Department, CIC 176, E. Karamanescht, V. Khomenko, I. Korenkova (50 (53) 0/50)

**United Kingdom:** (54 teams) (3052 (3290) 1299/1753)

Aberdeen, The Royal Infirmary, Haematology Department, CIC 344, D.J. Culligan (22 (22) 2/20)  
Bangor, Ysbyty Gwynedd, Clinical Haematology & Oncology, CIC 736, D. Edwards (11 (11) 0/11)  
Bath Avon, Royal United Hospital, Haematology Department, CIC 619, C. Knechtli (10 (10) 0/10)  
Belfast, Belfast City Hospital, Ward 22m, CIC 268, M.F. McMullin, F. Jones, T.C.M. Morris, P. Abram (42 (46) 9/33)

Birmingham, The Children's Hospital, Haematology Department, CIC 781, S. Lawson (40 (42) 24/16)  
Birmingham, Queen Elizabeth Hospital, Haematology Department, CIC 387, C. Craddock, P. Mahendra (140 (155) 70/70)  
Birmingham, Birmingham Heartlands Hospital, Haematology Department, CIC 284, S. Paneesha (50 (62) 23/27)  
Blackpool, Blackpool Victoria Hospital, Haematology Department, CIC 832, M.P. Macheta (44 (45) 0/44)  
Bournemouth, Royal Bournemouth Hospital, Haematology Department, CIC 765, R. Hall (13 (13) 0/13)  
Bristol, Royal Hospital for Sick Children, Dept. Paediatric Hematology/BMT, CIC 386, J.M. Cornish, S. Robinson (126 (141) 84/42)  
Cambridge, Addenbrooke's Hospital, Department of Haematology, CIC 566, C. Crawley, J. Craig, H. Balsdon, T. Chapman (98 (103) 44/54)  
Cardiff, University Hospital of Wales, Dept. of Pediatrics, CIC 303:2, P. Connor (1 (1) 0/1)  
Cardiff, University Hospital of Wales, Haematology Department, CIC 303:1, K.M.O. Wilson (71 (79) 32/39)  
Cheltenham, Cheltenham General Hospital, Haematology Department, CIC 398, E. Blundell, S. Chown (15 (16) 0/15)  
Coventry, University Hospital & Warwickshire, Haematology Department, CIC 322, W. Bokhari (30 (31) 0/30)  
Dudley, The Dudley Group NHS Hospitals, Haematology Department, CIC 405, S. Fernandes (9 (9) 0/9)  
Dundee, Ninewells Hospital, Haematology Department, CIC 719, D. Meiklejohn (9 (9) 0/9)  
Edinburgh, Western General Hospital, Haematology Department, CIC 228, P.R.E. Johnson, J. Davies, F. Scott, P.H. Roddie, P. Shepherd (51 (55) 7/44)  
Exeter, Royal Devon and Exeter Hospital, Bone Marrow Transplant Unit, CIC 571, C. Rudin (9 (10) 0/9)  
Glasgow, Royal Hospital for Sick Children, Haematology Department, CIC 707, B. Gibson (16 (17) 11/5)  
Glasgow, Royal Infirmary and the Western Infirmary, Bone Marrow Transplant Unit, CIC 244, I.G. McQuaker, A. Parker T. Fitzsimons (110 (110) 50/60)  
Ipswich, Ipswich Hospital NHS Trust, Haematology Department, CIC 128, A. Hodson (8 (8) 0/8)  
Leeds, St. James's University Hospital, The General Infirmary, Pinderfields Hospital, Blood & Bone Marrow Transplant C., CIC 254, M. Gilleece, S. Kinsey, M. C. Galvin (94 (101) 41/53)  
Leicester, Leicester Royal Infirmary, Haematology Department, CIC 713, A.E. Hunter (72 (76) 27/45)  
Liverpool, Alder Hay Hospital, Hematology Treatment Centre, CIC 773, M. Caswell (7 (8) 5/2)  
Liverpool, Royal Liverpool Univ. Hospital, Haematology Department, CIC 501, R.E. Clark, R. Salim (53 (62) 19/34)  
London, St. Mary's Hospital, Paediatrics, CIC 866, J. de La Fuente, J.D. Cavenagh, S. Agrawal, T. Lister (20 (22) 20/0)  
London, Hammersmith Hospitals NHS Trust, Haematology BMT Unit, CIC 205, J. Apperley, E. Olavarria, E. Kanfer, A. Rahemtulla, R. Szydlo (90 (106) 46/44)  
London, The London Clinic, Haematology Department, CIC 263, M. Potter, P. Gravett (24 (26) 13/11)  
London, St. George's Hospital, Haematology Department, CIC 539, M. Koh, E.C. Gordon-Smith (24 (25) 10/14)  
London, University College London Hospital, Haematology Department, CIC 224, K. Thomson (158 (169) 64/94)  
London, GKT School of Medicine, Haematology Department, CIC 763, A. Pagliuca, G. Mufti (150 (157) 66/84)  
London, Royal Marsden Hospital, Leukaemia Unit, CIC 218, M. Potter (173 (198) 74/99)  
London, The Royal Free Hospital, Dept. Haematology & BMT, CIC 216, S. Mackinnon (66 (70) 37/29)  
London, Parkside Hospital, Haemato-Oncology, CIC 450, R. Powles (2 (3) 0/2)  
London, St. Bartholomew's & Royal London Hospital, Haematology Department, CIC 768, J. Gribben, J. Cavenagh, S. Agrawal, T. Lister (112 (124) 39/73)  
London, Guy's Hospital, Haematology Department, CIC 721, M. Kazmi (34 (34) 17/17)  
London, Great Ormond Street Hospital, Dept. of Haematology/Oncology, CIC 243, P. Veys (76 (81) 57/19)  
Manchester, Christie NHS Trust Hospital, Adult Leukaemia & BMT Unit, CIC 780, A. Bloor (94 (108) 40/54)  
Manchester, Royal Children's Hospital, Dept. Ped Hematology, CIC 521, R. Wynn (24 (25) 19/5)  
Manchester, The Royal Infirmary, Haematology Department, CIC 601, J.A. Yin, E. Tholonli (106 (107) 61/45)  
Newcastle, Royal Victoria Infirmary and the Sunderland Royal Hospital, Haematology Department, CIC 276, M. Collins, G.H.Jackson, S.J. Proctor, P. Taylor, A. Cant, R. Skinner P.J. Carey (163 (171) 80/83)

Norwich, Norfolk & Norwich University Hospital, Haematology Department, CIC 391, M. Lawes, G. Turner (16 (17) 0/16)  
Nottingham, City Hospital, Haematology Department, CIC 717, N. Russell, J.L Byrne, A.P. Haynes, A. McMillan (148 (156) 71/77)  
Oxford, John Radcliffe Hospital, Headington and Wycombe General, Haematology Department, CIC 255, A. Peniket, T.J. Littlewood, G. Collins, C.Hatton (103 (109) 46/57)  
Plymouth, Derriford Hospital, Plymouth Hospitals NHS Trust, CIC 823, M.D. Hamon (55 (56) 12/43)  
Poole, Poole Hospital NHS Foundation Trust, Haematology Department, CIC 458, J. Fergus (16 (16) 0/16)  
Salisbury, Salisbury NHS Foundation Trust, Haematology Department, CIC 757, J. Cullis (4 (4) 0/4)  
Sheffield, Sheffield Teaching Hospitals NHS Foundation Trust, Sheffield Transpl. Unit/Haematology, CIC 778, J. Snowden (108 (116) 39/69)  
Somerset, Taunton and Somerset Hospital, Haematology Department, CIC 708, S. Bolam (14 (15) 0/14)  
Southampton, Southampton General Hospital, Medical Oncology Unit, CIC 704, D. Richardson, A. Duncombe (83 (90) 40/43)  
Stoke-on-Trent, North Staffordshire Royal Infirmary, BMT Unit, CIC 394, S. Pillai, R. Chasty (15 (18) 0/15)  
Swansea, Swansea NHS Trust, Haematology Department, CIC 554, S. Al Ismail (19 (20) 0/19)  
Swindon, The Great Western Hospital, Haematology Department, CIC 608, N. E. Blesing, A. Gray, S. Green, A. Koster (4 (5) 0/4)

\*Data was taken directly from the EBMT Registry
